1 **Functional genome and microbiome in blood of goats affected by the**  
2 **gastrointestinal pathogen *Haemonchus contortus***

3  
4 Yonathan Tilahun

5  
6 *E-mail addresses:* [yonathan.tilahun@langston.edu](mailto:yonathan.tilahun@langston.edu)

7  
8 <sup>a</sup> School of Agriculture and Applied Sciences, Langston University, Langston, Oklahoma  
9 73050, USA

10  
11 **Abstract**

12 The Alpine goat *Capra aegagrus hircus* is parasitized by the barber pole worm  
13 (*Haemonchus contortus*). This relationship results in changes that affect the gene  
14 expression of the host, the pest, and the microbiome of both. Hematological parameters  
15 indicating genes that are expressed and/or the % Composition of abundant and diverse  
16 microbial flora are reflective of infestation. We explored the similarity/dissimilarity  
17 between and among blood samples of non-infected, infected, infected zoledronic acid-  
18 treated, and infected antibody (anti- $\gamma\sigma$  T cells) treated wethers under controlled conditions.  
19 We identified responses to barber pole worms using blood-based analysis of transcripts  
20 and the microbiome. Seven (7) days post-inoculation (dpi) we identified 7,627 genes  
21 associated with different treatment types. Across all treatments we identified fewer raw  
22 read counts and a reduced diversity in microbial flora on 7 dpi than in 21 dpi wethers. We  
23 also identified that there were differences in % Composition of microbial flora known to  
24 be associated with inflammation. This study identifies treatment specific genes, and an  
25 increase in microflora abundance and diversity as wethers age post infestation. Further,  
26 *Firmicutes/Bacteroidetes* (F/B) ratio reflect metabolic health, based on depression or  
27 elevation above thresholds defined by the baseline of non-infected hosts depending on the  
28 type of intrusion exhibited by the pest.

29 *Keywords:* Small Ruminants, Gene Expression, Strongylida, Nematode, Parasite  
30 Diagnostics

31

## 32 **Introduction**

33

34 *Capra aegagrus hircus* (the Alpine goat) is parasitized by many strongylid nematodes.  
35 Among these the barber pole worm (*Haemonchus contortus*) is particularly important [1].  
36 They are the principal parasites of goats, causing global losses to agriculture estimated at  
37 over \$100 billion each year, increasing every year since 1987 [2]. This nematode is a blood-  
38 sucking parasite and can remove < 30 µL of blood/day from the host, inducing anemia and  
39 often death.

40

41 *Haemonchus contortus* can prove fatal if untreated in cattle, sheep, and goats [3]. Adult  
42 worms are inhibited by goats until the environment becomes favorable. Such circumstances  
43 increase susceptibility in kids up to eight weeks after parturition [4]. Even moderate  
44 infections can reduce milk production and lead to stunted growth in kids. Other effects  
45 include anemia, low packed cell volume (PCV), diarrhea, dehydration, peripheral, and  
46 internal fluid accumulation, lower reproductive performance, higher mortality and more  
47 frequent illness [5]. Worm egg counts are the primary method to diagnose worm infections  
48 before localized production losses [6]. Significant blood loss leads to visual signs of  
49 infestation that may be confused with or due to a combined effect from other types of  
50 parasites and diseases.

51

52 *H. contortus* produces excretory and secretory products that depress the host immune  
53 response [7,8,9]. The host counters through immune responses by its genome and  
54 microbiome in a back-and-forth arms race [9]. The specific method that is used to avoid  
55 host surveillance is not fully understood, but one theory suggests helminth inflammation  
56 inhibition is completed by modulating butyrate biosynthesis [10,8].

57

58 The microbiome is composed of bacteria, archeal, viral, and fungal microbial taxa. These  
59 may be commensal, mutualistic, or pathogenic, serving roles ranging from beneficial to  
60 inconsequential or detrimental [11]. We described our performance and analysis to identify  
61 differences in microbiome composition displaying significant differences in abundance  
62 between uninfected control wethers, infected only wethers with *H. contortus*, infected

63 wethers treated with zoledronic acid (ZA), and infected wethers treated with anti- $\gamma\sigma$  T cell  
64 antibodies (AB). These different states or treatments will estimate “metabolic health” in  
65 small ruminant goat blood microbiomes (GBMs) following infection by the barber pole  
66 nematode *H. contortus*. A large array of products exuded from intestinal helminths  
67 modulate microbial community growth and metabolism [11]. Also, *H. contortus* compete  
68 with naturally occurring flora of the host for energy-rich nutrients or essential minerals  
69 [12]. Infection by *H. contortus* is known to impact intestinal physiology by increasing fluid  
70 secretion that alters the habitat of healthy bacterial communities [11]. We examine if this  
71 impacts the GBM.

72

73 Helminth infestations are known to quickly change the metabolic activity of the abomasum  
74 in hosts versus unafflicted small ruminants [7,13,8]. An array of structures, cells, and  
75 secretions respond to infestation [14-16]. Natural microbiotas provide resources for innate  
76 immunity [16]. This typically happens via altered microbiota diversity richness when  
77 compared to un-infested animals [10].

78

79 The genes expressed by an organism’s genome are major players in how and when the host  
80 responds to a parasite. Additionally, the microbiome modulates responses via internal and  
81 external environmental cues [17]. Infestation of a host by a parasite interact with  
82 surrounding environmental factors to form an intricate web of stimuli and responses by  
83 both entities. The microbiome influences many aspects of these diverse ecosystems [18].  
84 A tri-directional interaction is predicted [19], whereby the host depends on its own genome  
85 and its vast microbiome content to defend itself against external stressors including parasite  
86 intrusions.

87

88 Although blood is assumed to be sterile, devoid of other types of cells [20,21],  
89 microorganisms often occur in blood without inducing disease [20,21,22]. Here, we  
90 describe the blood expressed transcriptomes, the abundance and diversity of resident  
91 microorganisms, their phylogenetic affiliations, and their relevance towards a  
92 metabolically healthy GBM of both uninfected and infected small ruminant *Capra hircus*  
93 wethers with *H. contortus*.

94

95 We hypothesize that the microflora composition responds to parasite infestation; therefore,  
96 the immune response is expressed through genes exhibited by the host genome and its  
97 microbiome. We hypothesized that the host genome and the microbiome respond to  
98 invasion by parasites by depressing the *Firmicutes/Bacteroidetes* ratio below threshold. We  
99 predicted that host genomes would express more immunological genes and that microfloral  
100 composition and populations would change over time.

101

## 102 **Objectives**

103 The objectives of the research described here are to identify if blood may be used as a  
104 parasite diagnostic tool by: 1) analyzing the different responses to different treatments  
105 (uninfected wethers, infected wethers with *H. contortus*, infected wethers treated with  
106 zoledronic acid (ZA), and infected wethers treated with anti- $\gamma\sigma$  T cell antibodies (AB)) as  
107 determined by transcriptomic and metagenomic analyses; 2) identifying genes expressed  
108 from these treatments after seven (7) days post inoculation (dpi); 3) comparing microbial  
109 flora abundance and diversity between seven 7 dpi and 21 dpi using operational taxonomic  
110 units (OTUs); 4) and by determining if there are significant differences between  
111 *Firmicutes/Bacteroidetes* (*F/B*) ratios as an indication of infection in order to determine  
112 differences of “metabolic health” in wethers.

113

## 114 **Materials and Methods**

115

### 116 **Ethical statement**

117

118 The treatment of animals in our research abided by the guidelines of the Langston  
119 University Institutional Animal Care and Use Committee (LUACUC) Approval # 2018-  
120 14.

121

122

### 123 **Animals and treatments**

124

125 Forty (40) Alpine wethers (114.2±0.92 d of age; 19.4±0.33 kg BW at the start of  
126 experiment) being raised in indoor pens at the Langston University farm were used. The  
127 animals were checked for fecal egg counts (FECs) and confirmed that they were nematode-  
128 parasite free. The animals were allocated randomly to four (4) groups of 10 animals each,  
129 and two (2) or three (3) animals from each group were assigned to one of the four (4) pens.  
130 All animals were allowed to acclimatize to pens and feeders for daily supplies of 200 g  
131 concentrate pellet per animal composed of 500 g of ground grass (50%) and alfalfa (50%)  
132 hays. The treatment groups were as:

133 **Table 1. Experimental Set-up.** Treatment Group (1-4) for infection L3 *H. contortus* (+)  
134 or non-infection *H. contortus* (-), with (+) or without (-) treatment type (Zoledronic acid  
135 injection or  $\gamma\delta$  T depletion).

136

| 137 | <u>Group</u> | <u>L3 <i>H. contortus</i> infection</u> | <u>Zoledronic acid</u> | <u><math>\gamma\delta</math> T depletion</u> |
|-----|--------------|-----------------------------------------|------------------------|----------------------------------------------|
| 138 | 1            | -                                       | -                      | -                                            |
| 139 | 2            | +                                       | -                      | -                                            |
| 140 | 3            | +                                       | +                      | -                                            |
| 141 | 4            | +                                       | -                      | +                                            |

142

143 On the first (1) day prior to the L3 infection, the anti- $\gamma\delta$  T cells antibody were  
144 administered intravenously. ZA were administered intravenously 7 days prior to and 0, 7,  
145 and 14 days after the L3 infection. At the beginning of the experiment all kids except Group  
146 1 were given 10,000 *H. contortus* infective larvae (L3; hatched and isolated from feces  
147 being collected from LU goats) by gavage. Five animals from each group were euthanized  
148 on seven (7) days post inoculation (dpi) for sampling and the other five (5) animals were  
149 euthanized 21 dpi.

150

### 151 **Blood sample collection and processing**

152

153 Blood samples were collected from five goats in four treatment groups (No infection,  
154 Infection, Infection ZA inject, and Infection AB inject), following 7 dpi. Blood samples

155 included red blood cells, white blood cells (total and differential), hemoglobin, platelets,  
156 and plasma protein, from the jugular vein in EDTA tubes. Quality assurance/quality control  
157 (QA/QC) parameters resulted in blood samples from 19/20 cDNA libraries that were used  
158 from samples collected 7 dpi. The cDNA libraries were sequenced on an illumina RNA-  
159 Seq Next-generation sequencing (NGS) instrument and filtered and normalized using  
160 Partek® Flow® software suites.

161

162 Also, methods of identifying naturally occurring microbial flora in nontreated and treated  
163 wethers were identified. Analytics for QA/QC for high-throughput barcoded illumina  
164 MiSeq NGS sequencing of 16S rRNA, resulted in 18/20 samples that were obtained for 7  
165 dpi and 20/20 samples for 21 dpi.

166

## 167 **Total RNA Purification**

168

169 Total RNA was collected from blood samples using a modified TRIzol reagent procedure.  
170 The blood samples were lysed by using ice chilled TRIzol Reagent. The broken cells  
171 were homogenized by pipetting up and down many times. After transferring the  
172 homogenized and broken cells into Eppendorf, Chloroform was added to the lysed  
173 cells. It gave three layers. The upper aqueous layer contained extracted RNA, an  
174 interphase contained DNA, and proteins were dissolved in the bottom red organic  
175 layer. The pH was kept at around 4 for RNA purification, which held RNA in the  
176 aqueous phase preferentially. After centrifugation, the upper aqueous layer was  
177 pipetted out carefully and isopropanol was added to precipitate the RNA. Again, the  
178 RNA was precipitated by centrifugation to get RNA pellets which were washed with  
179 70% ethanol (made with DEPC treated water), air-dried and suspended in DEPC  
180 treated (RNase free) water. Extracted RNA was quantified to calculate yield by a  
181 NanoDrop™ 2000 spectrophotometer.

182

### 183 *A. Lysate Preparation from Blood*

184

185 The cDNA libraries were constructed by initial first strand synthesis using the Protocol  
186 for Non-directional RNA-seq Workflows and NEBNext® Ultra™ II RNA First Strand  
187 Synthesis Module (E7771), according to a modified manufacturer's protocol as follows:

#### 188 **Input Amount Requirement**

189

190 A 100 ng total RNA was quantified after the purification. The protocol was optimized for  
191 approximately 200 nt RNA inserts. The protocol was optimized using Universal Human  
192 Reference Total RNA.

193

194

195

196

#### 197 **RNA Fragmentation and Priming**

198

199 The fragmentation and priming reactions were assembled on ice in a nuclease-free tube by  
200 adding the Fragmentation and Priming Mix for a total volume of 10  $\mu$ L. They were mixed  
201 thoroughly by pipetting. The samples were placed in a thermocycler and incubated at 94  
202 °C. The tube was immediately transferred to ice and First Strand cDNA Synthesis was  
203 begun immediately.

204

#### 205 **First Strand cDNA Synthesis Reaction**

206

207 The first strand synthesis reaction was assembled on ice by adding components to the  
208 fragmented and primed RNA for a total volume of 20  $\mu$ L. The reaction was mixed  
209 thoroughly by pipetting. The sample was incubated in a preheated thermocycler with the  
210 heated lid set at  $\geq 80$  °C as follows: Step 1: 10 minutes at 25° C; Step 2: 15 minutes at 42  
211 ° C; Step 3: 15 minutes at 70 ° C; and Step 4: Hold at 4° C. We then proceeded directly to  
212 Swift Biosciences™ ACCEL-NGS® 1S PLUS DNA LIBRARY KIT: Single, Dual  
213 Combinatorial and Unique Dual Indexing and prepared the DNA Libraries as follows:

214

#### 215 **Denaturation**

216

217 Due to the short incubation time of the denaturation step, all of the reagents of the Adaptase  
218 Reaction Mix were pre-assembled and placed on ice. The thermocycler was pre-heated to  
219 95° C. The fragmented DNA sample was transferred to a 0.2 mL PCR tube and the volume  
220 of the sample adjusted to a final volume of 15 µL using Low EDTA TE, if it was necessary.  
221 The samples were placed in the thermocycler, programmed at 95 ° C for 2 minutes with lid  
222 heating ON. Upon completion, the tube(s) were placed on ice immediately for 2 minutes.  
223 We then proceeded directly to the Adaptase step to preserve the maximum amount of  
224 ssDNA substrate.

225

### 226 **Adaptase**

227

228 The Adaptase Thermocycler Program was loaded on the thermocycler and paused at the  
229 first step to pre-heat to 37 ° C until all samples were loaded. Twenty-five (25) µL of the  
230 pre-assembled Adaptase Reaction Mix was added to each PCR tube containing a 15 µL  
231 DNA sample and mixed by pipetting or gentle vortexing until homogeneous, after which  
232 they were spun down. The samples in the thermocycler were run at the following  
233 parameters with the lid heating ON. The thermocycler Program followed: 37° C, 15  
234 minutes; 95° C, 2 minutes; and a 4° C hold.

235

### 236 **Extension**

237

238 The Extension Thermocycler Program was loaded on the thermocycler and paused at the  
239 first step to pre-heat to 98° C until all samples were loaded. Forty-seven (47) µL of the  
240 Adaptase Reaction was added, using reagents in the order listed in the manufacturers  
241 protocol. The sample was mixed by pipetting or gentle vortexing until homogenous and  
242 spun down. The samples were placed in the thermocycler and the following program was  
243 run, with lid heating ON. The thermocycler Program followed: 98° C, 30 seconds; 63° C,  
244 15 seconds; 68° C, 5 minutes; and a 4° C hold. Each sample was transferred to a 1.5 mL



245 tube and clean up the Extension Reaction using beads and freshly prepared 80% ethanol  
246 was completed.

247

248

#### 249 **Ligation**

250

251 Twenty (20)  $\mu$ L of the pre-mixed Ligation Reaction Mix was placed in a new PCR tube  
252 containing 20  $\mu$ L of the Post-Extension eluate. Samples were mixed by pipetting or gently  
253 vortexing until homogenous and spun down. The samples were placed in the thermocycler  
254 programmed at 25 ° C for 15 minutes with lid heating ON, followed by a 4° C hold. Each  
255 sample was transferred to a 1.5 mL tube and clean up the Ligation Reaction using beads  
256 and freshly prepared 80% ethanol was completed.

257

#### 258 **Indexing PCR**

259

260 Five (5)  $\mu$ L of the appropriate indexed adapter primer(s) were added directly to each  
261 sample. Twenty-five (25)  $\mu$ L of the already pre-mixed Indexing PCR Reaction Mix were  
262 added to each PCR tube containing 25  $\mu$ L of sample, using reagents in the order listed in  
263 the manufacturers protocol. Samples were mixed by pipetting or gently vortexing until  
264 homogenous and spun down. The samples were placed in the thermocycler and the  
265 following program run with the proper recommended PCR cycles, with lid heating ON.  
266 The thermocycler Program followed: 98° C, 30 seconds; PCR Cycles: 98° C, 10 seconds;  
267 60° C, 30 seconds; 68° C, 60 seconds; 4° C hold. Each sample was transferred to a 1.5 mL  
268 tube and clean-up of the Indexing PCR Reaction using beads and freshly prepared 80%  
269 ethanol was completed.

270

#### 271 **Size Selection/Clean-up**

272

273 The following protocol was used for each clean-up step, substituting the correct Sample  
274 Volume, Bead Volume, and Elution Volume based on the table provided for each section.

275 The magnetic beads were at room temperature and vortexed the beads to homogenize the  
276 suspension before use. Each Sample Volume was transferred to a 1.5 mL tube. The  
277 specified Bead Volume was added to each sample, mixed by vortex, and quickly spun on  
278 a tabletop microcentrifuge. The samples were incubated for 5 minutes at room temperature  
279 (off the magnet) and placed on a magnet rack until the solution cleared and a pellet formed  
280 (~2 minutes). The supernatant was removed and discarded without disturbing the pellet  
281 (less than 5  $\mu$ L may have been left behind). A freshly prepared 80% ethanol solution (500  
282  $\mu$ L) was added to the samples while still on the magnetic rack. Using care not to disturb  
283 the pellet, the samples were incubated for 30 seconds, and then the ethanol solution was  
284 removed. This step was repeated once more for a second wash with the 80% ethanol  
285 solution. The samples were spun in a tabletop microcentrifuge and placed back on the  
286 magnetic rack. Residual ethanol solution was removed from the bottom of the tube. The  
287 specified Elution Volume of Low TE buffer was added and the pellet re-suspended.  
288 Samples were mixed by pipetting up and down until homogenous. Incubation of the  
289 samples was completed at room temperature for 2 minutes off the magnet, then placed on  
290 the magnet. The entire eluate was transferred to a new 0.2 ml PCR tube. The eluate, without  
291 containing the magnetic beads (indicated by brown coloration in the eluate), was ensured  
292 to be pure by pipetting the samples into a new tube, placing on a magnet, and transferring  
293 the eluate again.

294

## 295 **Microbiome DNA Isolation**

296

297 Microbiome DNA was collected from blood samples using a modified Microbiome DNA  
298 Isolation Kit from NORGEN BIOTEK CORP. (Thorold, ON, Canada). The procedures are  
299 as follows:

300

### 301 ***A. For Samples Collected using Norgen's Preservation Devices***

302

303 Transferal of 0.5 mL of whole blood sample to a 2 mL DNAase-free microcentrifuge tube  
304 were completed. Lysis Buffer was added and the tube vortexed. One hundred (100)  $\mu$ L of  
305 Lysis Additive was added to the mixture and vortexed briefly. The mixture was incubated

306 at 65° C for 5 minutes. The tubes were centrifuged for 2 minutes at 20,000 x g (~14,000  
307 RPM). The supernatant was transferred to a DNAase-free microcentrifuge tube. One  
308 hundred (100) µL of Binding Buffer was added and mixed before incubation on ice.  
309 Centrifugation was completed for 2 minutes at 20,000 x g (~ 14,000 RPM). A pipette was  
310 used to transfer up to 700 µL of supernatant into a 2mL DNAase-free microcentrifuge tube.  
311 An equal volume of 70% ethanol was added to the lysate collected above and vortexed.

### 312 ***B. Binding to Column***

313

314 A spin column with one of the provided collection tubes was assembled. Seven hundred  
315 (700) µL of the clarified lysate with ethanol was added onto the column and centrifuged  
316 for 1 minute at 10,000 x g (~ 10,000 RPM). The flowthrough was discarded, and the spin  
317 column reassembled with the collection tube. The step with the remaining volume of lysate  
318 mixture was repeated.

319

### 320 ***C. Column Wash***

321

322 Five hundred (500) µL of Binding Buffer was added to the column and centrifuged for 1  
323 minute at 10,000 x g (~ 10,000 RPM). The flowthrough was discarded, and the spin column  
324 reassembled with its collection tube. Five hundred (500) µL of Wash Solution was applied  
325 to the column and centrifuged for 1 minute at 10,000 x g (~ 10,000 RPM). The flow-  
326 through was discarded and the spin column reassembled with its collection tube. Repeat  
327 the previous two steps. The column was centrifuged for 2 minutes at 20,000 x g (~ 14,000  
328 RPM) in order to thoroughly dry the resin. The collection tube was discarded.

329

### 330 ***D. DNA Elution***

331

332 The column was placed into a fresh 1.7 mL Elution tube provided with the kit. Fifty (50)  
333 µL of Elution Buffer was added to the column. Centrifugation was completed for 1 minute  
334 at 200 x g (~ 2,000 RPM), followed by a 1-minute spin at 20,000 xg (~14,000 RPM). An  
335 additional elution was performed using 50 µL of the Elution Buffer.

336

337 ***E. Storage of DNA***

338

339 The purified genomic DNA was stored at -80° C.

340

341 **Sequencing**

342

343 Quality Assurance/Quality Control of bar-coded sequence prepped samples of cDNA were  
344 completed by The Genomics Core Facility at Oklahoma State University (Stillwater, OK).  
345 The Genomics Core Facility at Oklahoma State University (Stillwater, OK) completed the  
346 cDNA library sequencing with an illumina RNASeq NGS instrument.

347

348 Quality Assurance/Quality Control of bar-coded sequence prepped samples were  
349 completed and sequenced for 16S rRNA metagenomics of blood samples by Swift  
350 Biosciences™ (Ann Arbor, MI USA) using an illumina MiSeq NGS instrument.

351

352 **Computational Analysis**

353 Several methods were utilized to conduct bioinformatic analysis of the obtained sequence  
354 data. For gene expression analyses, we used the Partek® Flow® software suites pipelines  
355 that include, but are not limited to the STAR algorithm, Normalization, and the gene set  
356 differential analysis method (GSA).

357

358 Preliminary analyses included Qiime2 analysis for the metagenomic or microbiome  
359 analysis. We present here, the results obtained utilizing the Kraken pipeline through the  
360 Partek® Flow® software suites, a start-to-finish software analysis solution for next  
361 generation sequencing data applications. Inflammation comparisons were based on the  
362 ratio of *Firmicutes/Bacteroidetes* (*F/B* Ratios) that are evident as well as the reduction of  
363 microbial diversity.

364

365 **Results**

366

367 We analyzed gene expression in samples from 19/20 wethers (7 dpi). The microbiome  
368 portion resulted in analysis of 38/40 wethers separated into 7 dpi (18/20 samples) and 21  
369 dpi (20/20 samples). Initially, ten (10) individuals were not infected with *H. contortus*, 10  
370 received infection with *H. contortus* only, 10 were infected with *H. contortus* and received  
371 ZA injections, and 10 were infected with *H. contortus* and received AB injection. As  
372 mentioned in this study blood samples were collected 7 dpi, where 19/20 cDNA libraries  
373 passed QA/QC analytics for cDNA gene expression analysis. QA/QC analytics of high-  
374 throughput barcoded illumina MiSeq NGS sequencing for 16S rRNA metagenomics,  
375 resulted in the 18/20 samples being obtained for 7 dpi and the 20/20 samples for 21 dpi.  
376 The sequences used for the purposes of this study, involved the inclusion of gene  
377 expression and metagenomic analyses. The initial design for the study is shown for 20  
378 individuals in Table 2 (Supplementary Documents).

379

380 *Haemonchus contortus* infection affected the metabolic system of wethers. A 95%  
381 confidence interval (\* =  $p < 0.05$ ) indicated likely significant changes in the expression of  
382 at least 184 genes (affecting treatment comparisons of samples that were infected with  
383 zoledronic acid injection versus infection with antibody injection Fig. 7) when using a  
384 numeric triad of p-values for no infection versus infection only, no infection versus  
385 infection zoledronic acid injection, and no infection versus infection with antibody  
386 injection. The hierarchical clustering/heat map (Figs. 1) generated after selection of three  
387 of the most highly significant specific differentially analyzed genes, depicts colored tiles  
388 showing differences in genomic features in the integration site data sets from the blood  
389 samples of each subject ( $n = 19$ ). They indicate the intensity and direction of any significant  
390 departures from the distributions of random controls varying to a degree depending on the  
391 type of treatment and the subject [19].

392

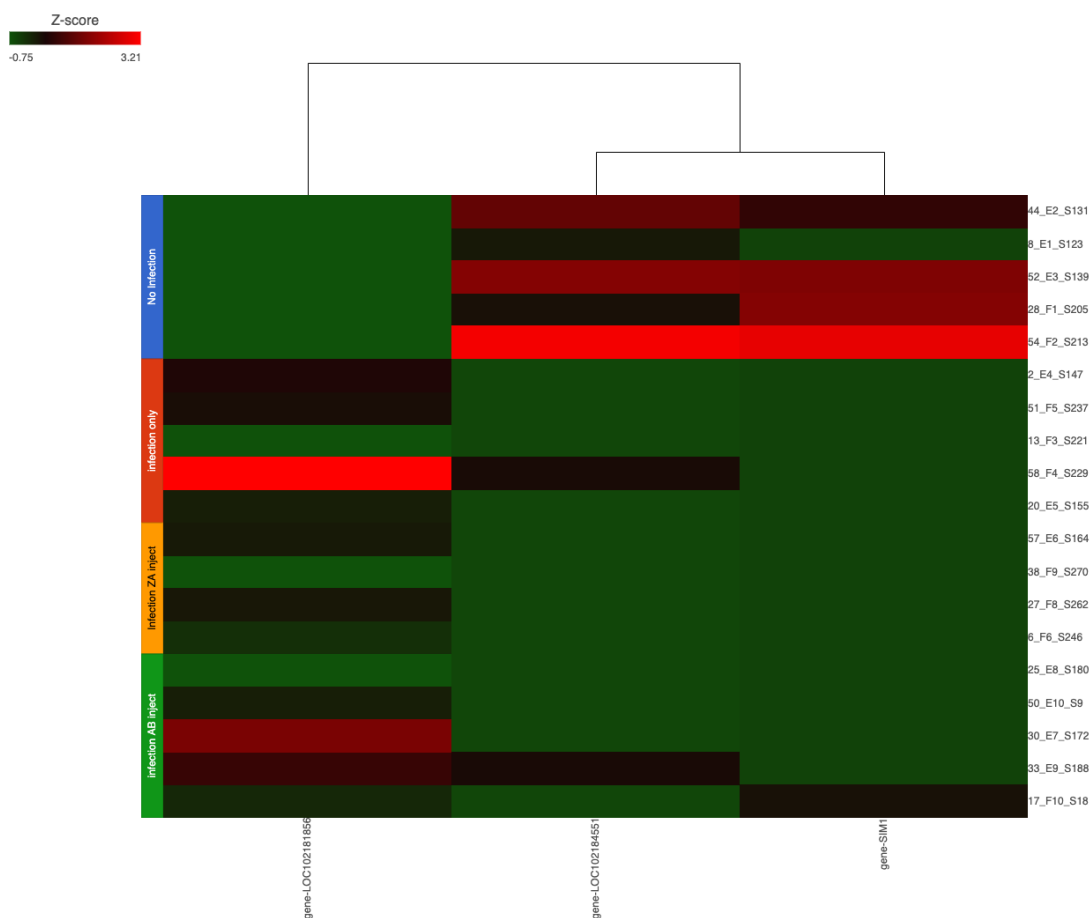

393

394 **Fig.1. Hierarchical clustering/heat map.** Three selected genes (identified at the bottom  
 395 of the image) following differential analysis using GSA counts of 19/20 samples  
 396 (identified on the right side of the image belonging to the described treatment group  
 397 identified on the left side of the image) indicate the most likely significant genes ( $p <$   
 398  $0.05$ ) affecting samples when comparing No Infection samples to those that were only  
 399 infected with the *H. contortus* pathogen, injected with zoledronic acid (ZA) or injected  
 400 with antibodies (AB) and then infected with the *H. contortus* pathogen on 7 dpi.

401

402 The following Volcano plots (Figs. 2-7) show genes that were identified as being  
 403 downregulated ( $* = < -2$ ), having no fold change (NC:  $* = > -2$ ,  $* = < 2$ ), and/or being  
 404 upregulated ( $* = > 2$ ). The Volcano plots illustrates the related distribution of genes out  
 405 of 7627 expressed, depending on subject and treatment type. The distribution of genes in  
 406 this case were based on comparisons using a numeric triad of p-values for no infection  
 407 versus infection only, no infection versus infection zoledronic acid (ZA) injection, and no

408 infection versus infection with antibody (AB) injection. Significance was based on a 95%  
409 confidence interval ( $* = p < 0.05$ ) where fold changes of downregulated, NC, and  
410 upregulated gene distributions of treatment groups were assessed. In Fig. 2 a comparison  
411 of no infection versus infection only subjects, out of 7627 genes that were expressed, 523  
412 genes were significant in expression during downregulation, NC, and upregulation. For  
413 the comparison of no infection vs infection ZA (Fig. 3), 290 genes that were significant  
414 in expression during downregulation, NC, and upregulation. In Fig. 4 289 genes were  
415 significant in expression during downregulation, NC, and upregulation when comparing  
416 no infection vs infection AB. In Fig. 5 examines the comparison of infection only vs  
417 infection ZA, resulting in the identification of 338 genes that were expressed with  
418 significance in expression during downregulation, NC, and upregulation. The Volcano  
419 plot for Fig. 6 indicates 275 genes that were expressed in fold changes for downregulated,  
420 NC, and upregulated genes that were significant.

421

422

423

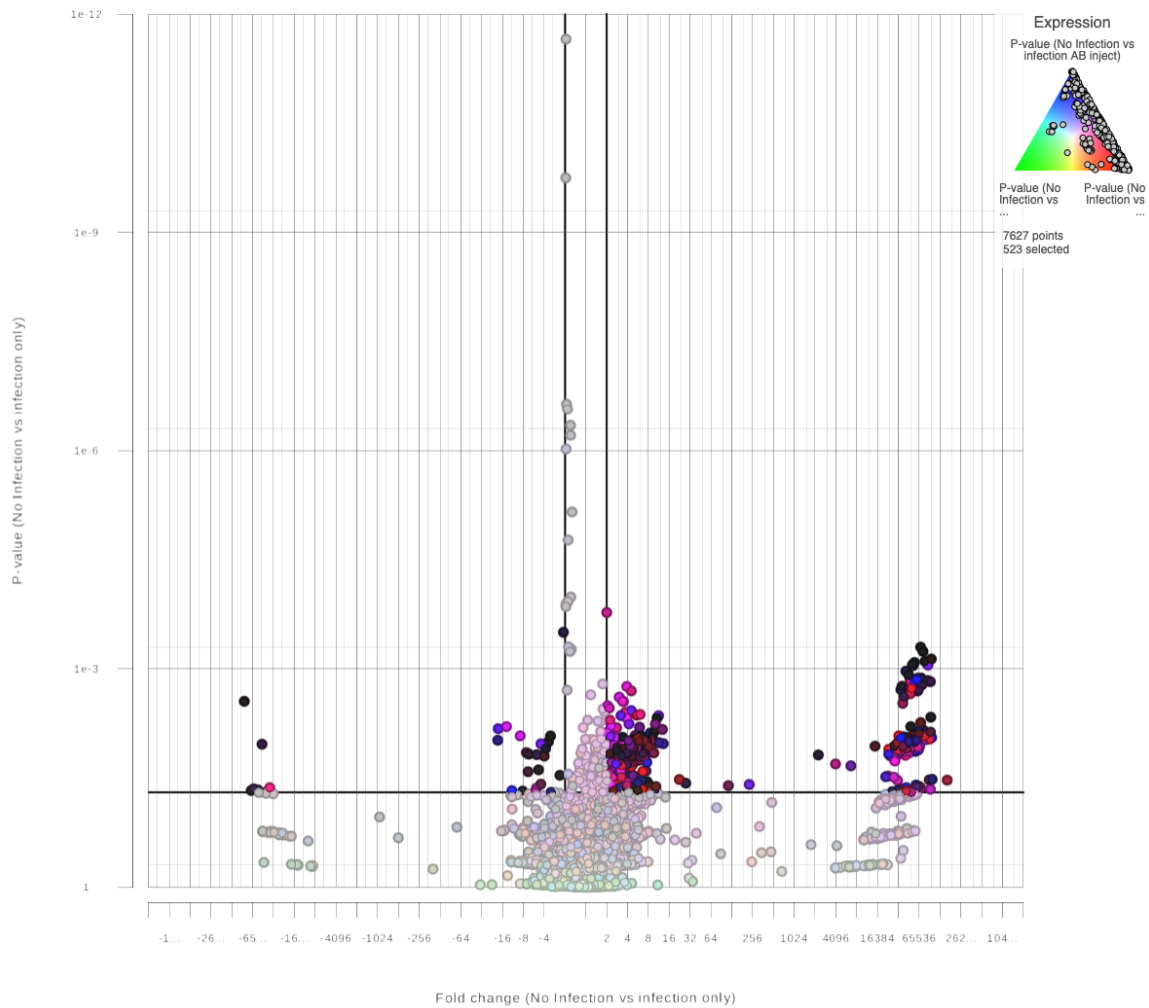

424

425 **Fig. 2. No Infection vs Infection only.** A Volcano plot for 19/20 blood samples  
426 indicating likely significant expression of genes ( $* = p < 0.05$ ) based on treatment type of  
427 *Capra hircus* following STAR alignment and GSA differential analysis for transcript  
428 sequences of 7627 identified genes expressed on 7 dpi. The fold change indicates  
429 downregulated ( $* = < -2$ ), no change (NC;  $* = > -2$ ,  $* = < 2$ ), and upregulated ( $* = > 2$ )  
430 gene distribution when comparing No Infection samples to infection only samples when  
431 expressed against a Numeric Triad of P-values for No Infection vs Infection only (green),  
432 No Infection vs Infection ZA inject (red) and No Infection vs infection AB inject (blue).  
433



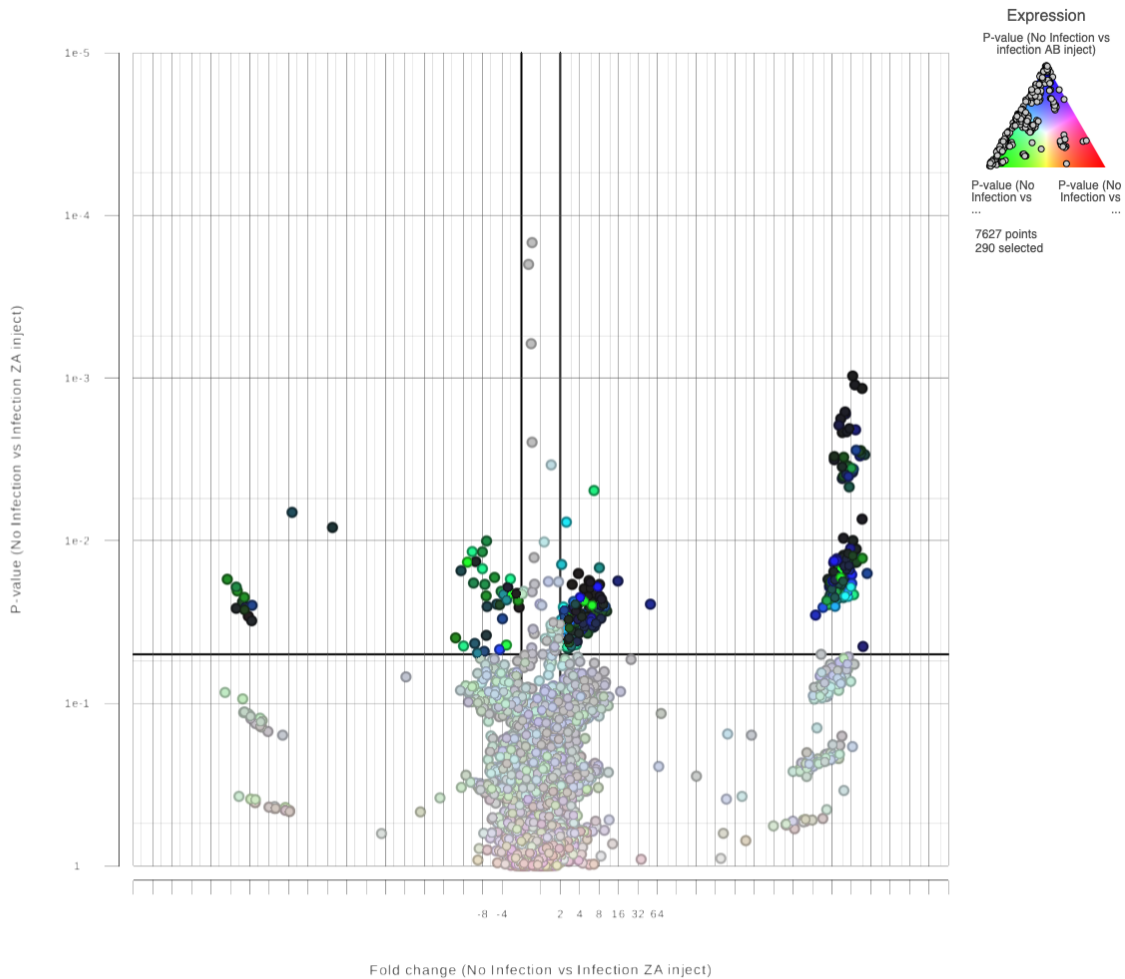

434

435 **Fig. 3. No Infection vs Infection ZA inject.** A Volcano plot for 19/20 blood samples  
436 indicating likely significant expression of genes ( $* = p < 0.05$ ) based on treatment type of  
437 *Capra hircus* following STAR alignment and GSA differential analysis for transcript  
438 sequences of 7627 identified genes expressed on 7 dpi. The fold change indicates  
439 downregulated ( $* = < -2$ ), no change (NC;  $* = > -2$ ,  $* = < 2$ ), and upregulated ( $* = > 2$ )  
440 gene distribution when comparing No Infection samples to Infection ZA inject samples  
441 when expressed against a Numeric Triad of P-values for No Infection vs Infection only  
442 (green), No Infection vs Infection ZA inject (red) and No Infection vs infection AB inject  
443 (blue).

444

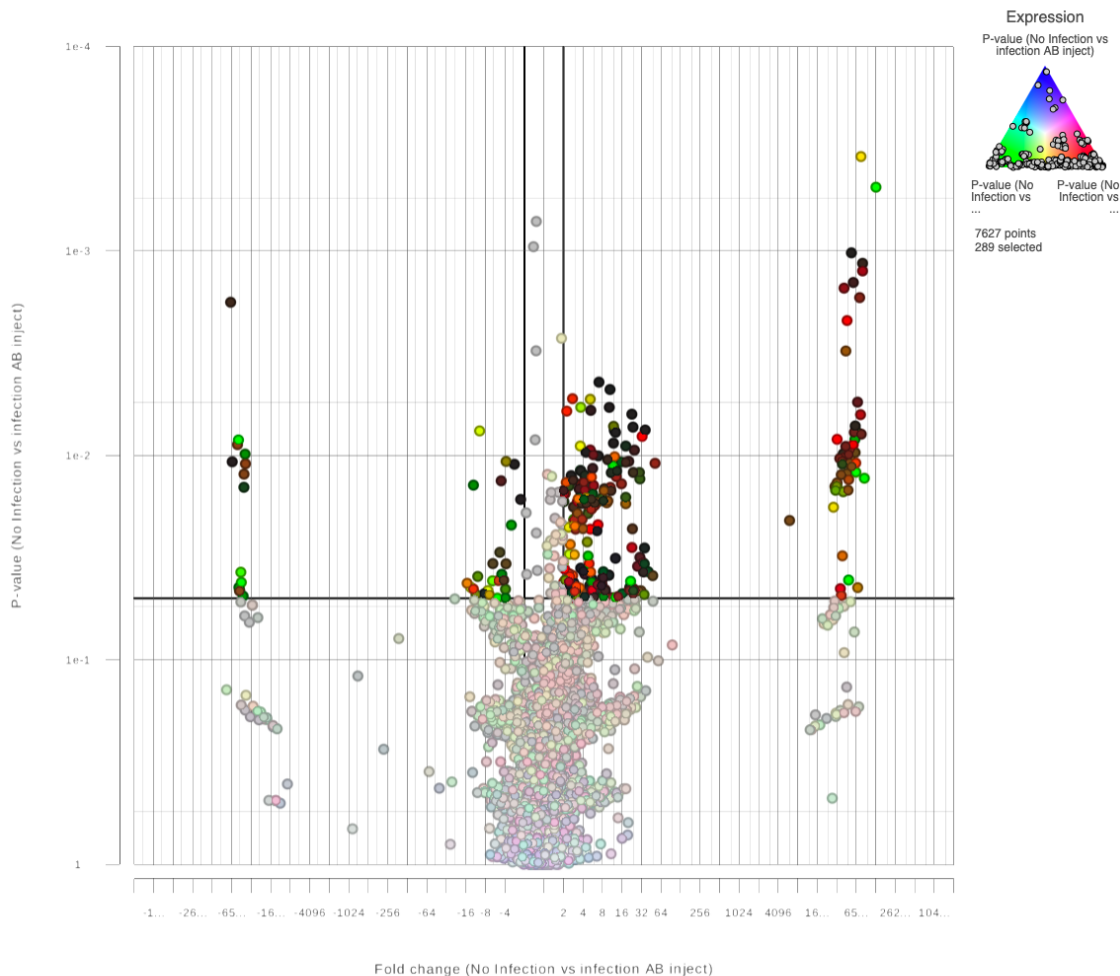

445

446

447

448

449 **Fig. 4. No Infection vs Infection AB inject.** A Volcano plot for 19/20 blood samples  
450 indicating likely significant expression of genes ( $* = p < 0.05$ ) based on treatment type of  
451 *Capra hircus* following STAR alignment and GSA differential analysis for transcript  
452 sequences of 7627 identified genes expressed on 7 dpi. The fold change indicates  
453 downregulated ( $* = < -2$ ), no change (NC;  $* = > -2$ ,  $* = < 2$ ), and upregulated ( $* = > 2$ )  
454 gene distribution when comparing No Infection samples to infection AB inject samples  
455 when expressed against a Numeric Triad of P-values for No Infection vs Infection only  
456 (green), No Infection vs Infection ZA inject (red) and No Infection vs infection AB inject  
457 (blue).

458

459

460

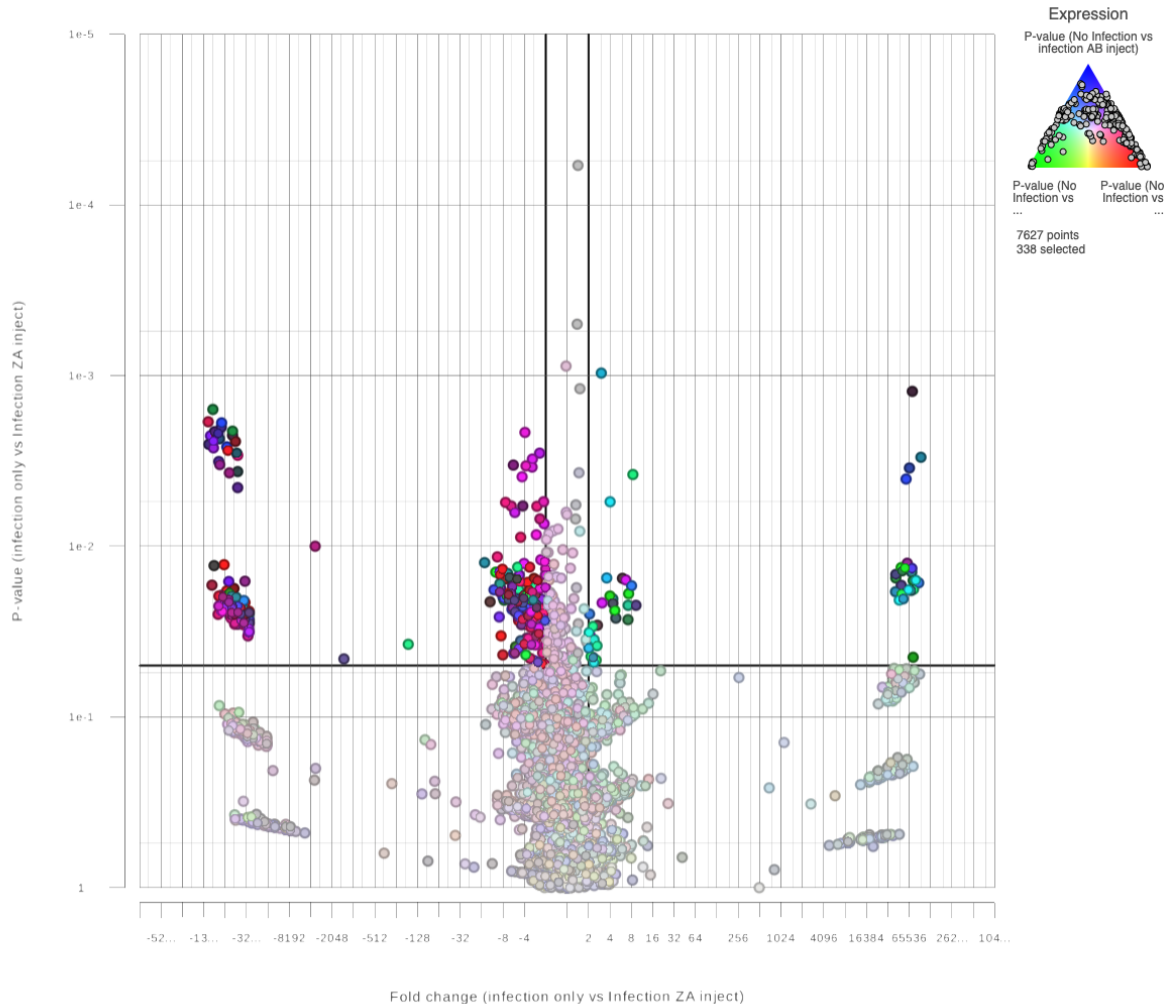

461 **Fig. 5. Infection only vs Infection ZA inject.** A Volcano plot for 19/20 blood samples  
462 indicating likely significant expression of genes ( $* = p < 0.05$ ) based on treatment type of  
463 *Capra hircus* following STAR alignment and GSA differential analysis for transcript  
464 sequences of 7627 identified genes expressed on 7 dpi. The fold change indicates  
465 downregulated ( $* = < -2$ ), no change (NC;  $* = > -2$ ,  $* = < 2$ ), and upregulated ( $* = > 2$ )  
466 gene distribution when comparing infection only samples to Infection ZA inject samples  
467 when expressed against a Numeric Triad of P-values for No Infection vs Infection only  
468 (green), No Infection vs Infection ZA inject (red) and No Infection vs infection AB inject  
469 (blue).

470

471

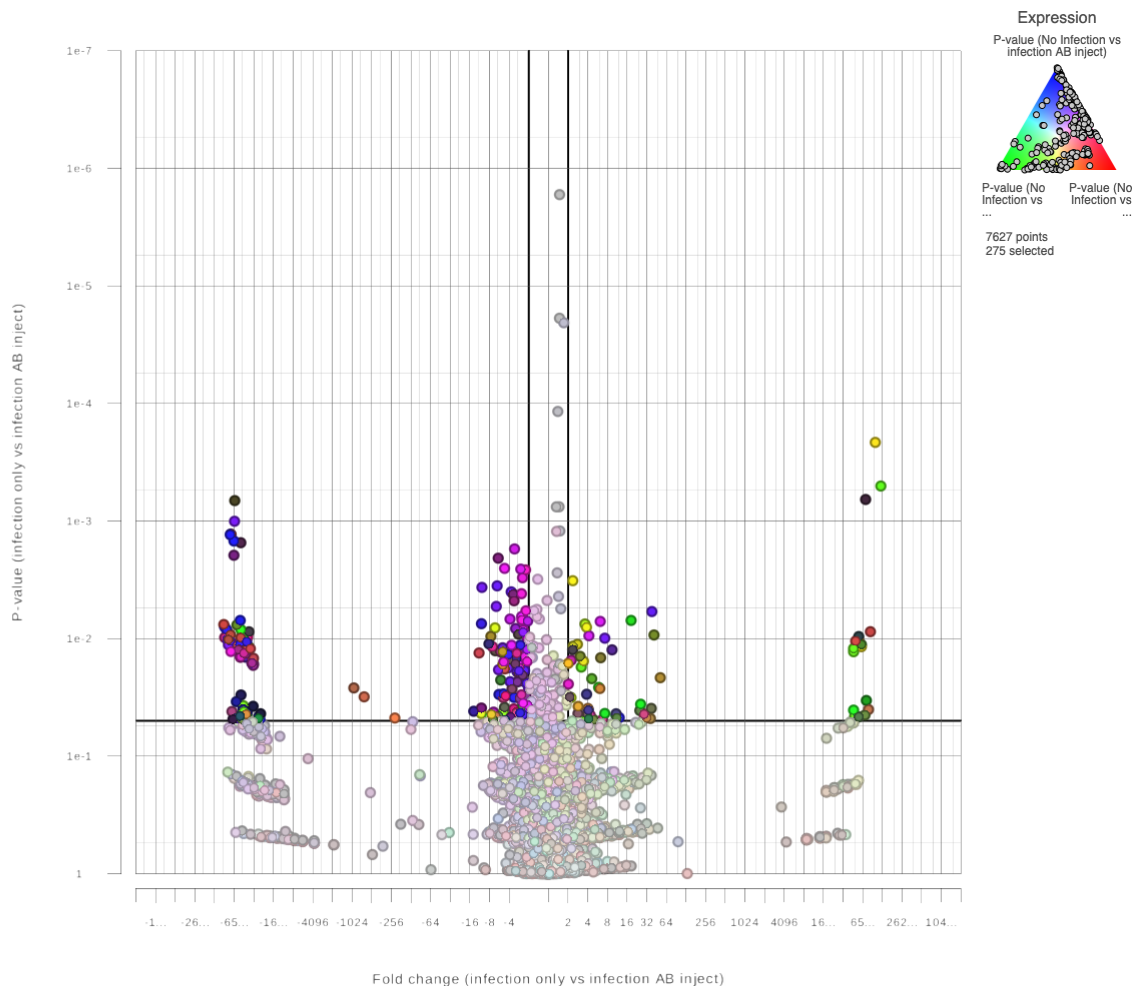

472

473 **Fig.6. Infection only vs Infection AB inject.** A Volcano plot for 19/20 blood samples  
474 indicating likely significant expression of genes ( $* = p < 0.05$ ) based on treatment type of  
475 *Capra hircus* following STAR alignment and GSA differential analysis for transcript  
476 sequences of 7627 identified genes expressed on 7 dpi. The fold change indicates  
477 downregulated ( $* = < -2$ ), no change (NC;  $* = > -2, * = < 2$ ), and upregulated ( $* = > 2$ )  
478 gene distribution when comparing infection only samples to infection AB inject samples  
479 when expressed against a Numeric Triad of P-values for No Infection vs Infection only  
480 (green), No Infection vs Infection ZA inject (red) and No Infection vs infection AB inject  
481 (blue).

482

483

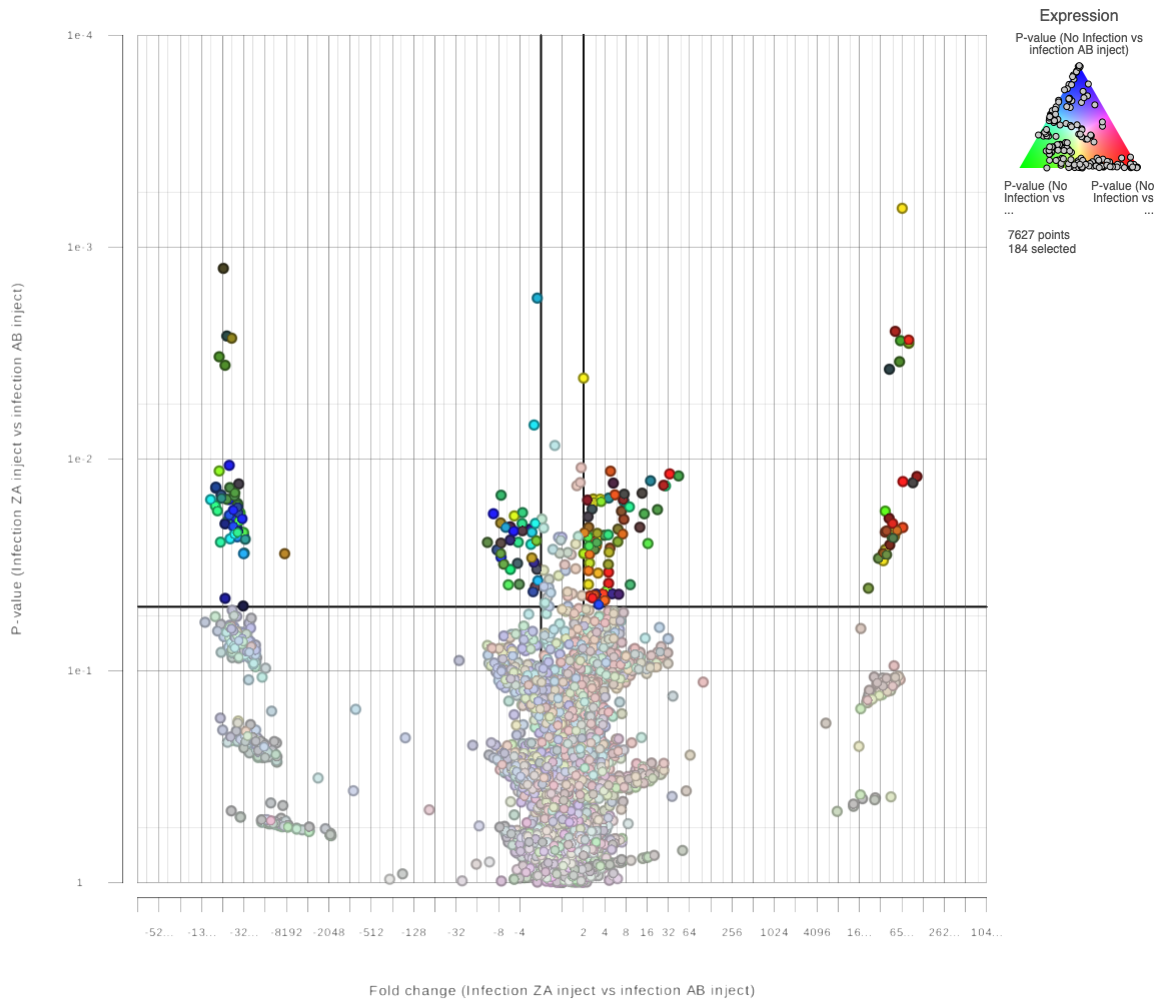

484

485 **Fig. 7. Infection ZA inject vs Infection AB inject.** A Volcano plot for 19/20 blood  
486 samples indicating likely significant expression of genes ( $* = p < 0.05$ ) based on  
487 treatment type of *Capra hircus* following STAR alignment and GSA differential analysis  
488 for transcript sequences of 7627 identified genes expressed on 7 dpi. The fold change  
489 indicates downregulated ( $* = < -2$ ), no change (NC;  $* = > -2$ ,  $* = < 2$ ), and upregulated ( $* = > 2$ )  
490 gene distribution when comparing Infection ZA inject samples to infection AB  
491 inject samples when expressed against a Numeric Triad of P-values for No Infection vs  
492 Infection only (green), No Infection vs Infection ZA inject (red) and No Infection vs  
493 infection AB inject (blue).

494

495 The average number of raw reads for metagenomic analyses of blood samples using Kraken  
496 is illustrated in Figs. 8 and 9. The distribution of raw read counts indicate the apparent  
497 difference in number between 7 dpi and 21 dpi subjects. There were 43.61 raw reads for  
498 metagenomic analysis of blood collected on 7 dpi as compared to 2,638.80 raw reads for  
499 metagenomic analysis of blood samples at 21 dpi.

500

501

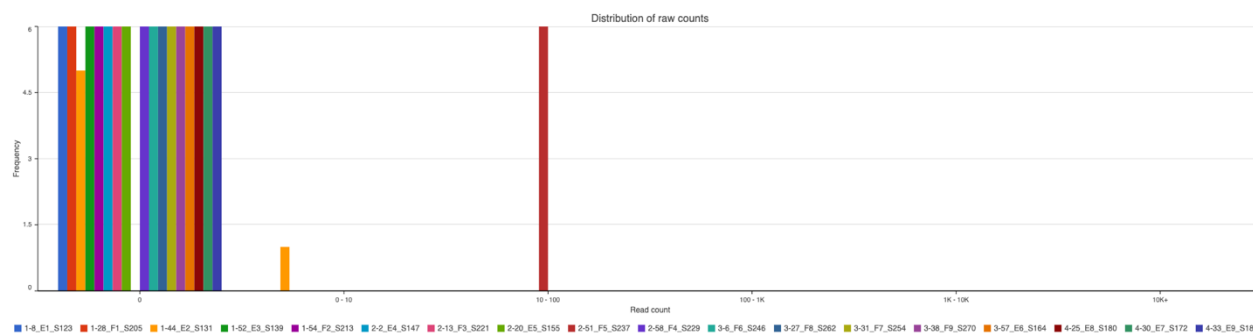

502

503 **Fig. 8. Distribution of raw read counts for all samples at 7 dpi.** The first number

504 before each sample ID identifies the treatment type (1 = No infection, 2 = Infection only,

505 3 = Infection ZA inject, and 4 = Infection AB inject).

506

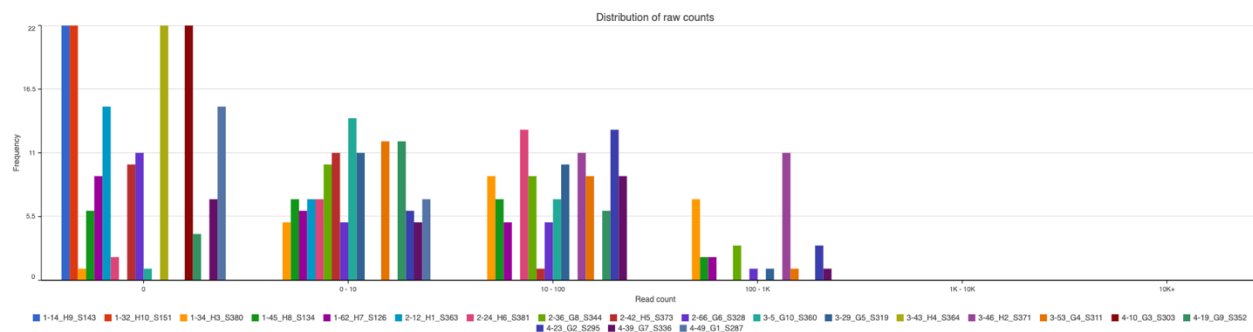

507

508 **Fig. 9. Distribution of raw read counts for all samples at 21 dpi.** The first number

509 before each sample ID identifies the treatment type (1 = No infection, 2 = Infection only,

510 3 = Infection ZA inject, and 4 = Infection AB inject).

511

512

513 After QA/QC, we collected Alpha diversity reports for 18 individuals for 7 dpi using

514 Shannon and Simpson distribution indices (Fig. 10) [12]. The Alpha diversity reports for

515 the Shannon and Simpson distribution indices (Table 3; Supplementary Documents) were

516 evaluated. Our results indicate that *H. contortus* has a significant effect on species-level  
 517 microbial diversity for blood that is infected and injected with ZA using both indices  
 518 [P(T<=t) first-tail 0.012 and P(T<=t) second-tail 0.023] (Table 4).

519  
 520

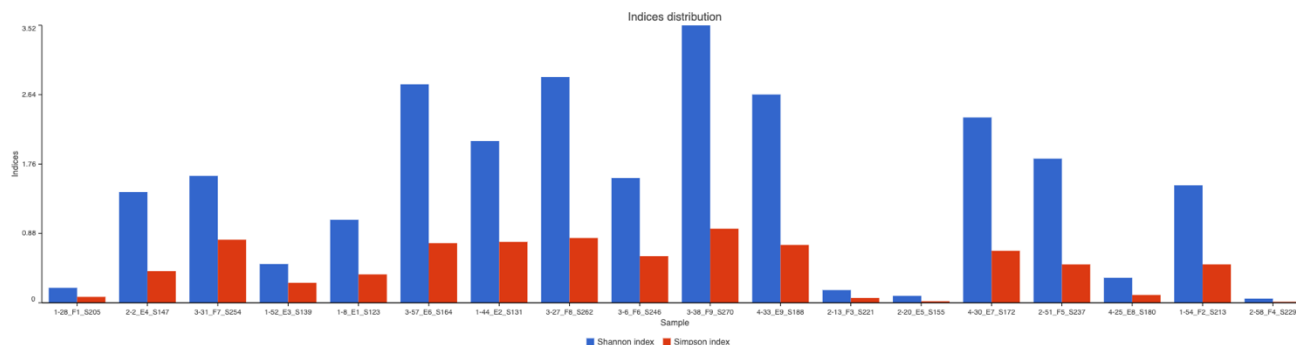

521

522 **Fig. 10. Shannon and Simpson indices of 7dpi.** Alpha diversity reports depicted by  
 523 Shannon and Simpson indices distributions for 18 samples of 7dpi (loss of sample  
 524 numbers 17 and 50 due to poor quality) [23-25] where single samples and the variation of  
 525 microbes in them are identified. The first number before each sample ID identifying the  
 526 treatment type (1 = No infection, 2 = Infection only, 3 = Infection ZA inject, and 4 =  
 527 Infection AB inject).

528

529 **Table 4. Significant values of 7 dpi Shannon and Simpson indices.** Statistical  
 530 comparison of a) Shannon and b) Simpson distribution indices for Alpha diversity reports  
 531 of 7 dpi richness and diversity of microbial flora in host *Capra hircus* wethers.

a) Shannon index

| Sample Comparisons                  | Mean      | Sample Size (n) | Sample Variance (s) | P(T<=t) first-tail | P(T<=t) second-tail |
|-------------------------------------|-----------|-----------------|---------------------|--------------------|---------------------|
| No Infection vs Infection ZA inject | n1 = 1.06 | 5               | 0.562               | <b>0.012</b>       | <b>0.023</b>        |
|                                     | n2 = 2.47 | 5               | 0.718               |                    |                     |

b) Simpson index

| Sample Comparisons | Mean       | Sample Size (n) | Sample Variance (s) | P(T<=t) first-tail | P(T<=t) second-tail |
|--------------------|------------|-----------------|---------------------|--------------------|---------------------|
|                    | n1 = 0.389 | 5               | 0.0685              |                    |                     |

|                                        |            |   |        |              |              |
|----------------------------------------|------------|---|--------|--------------|--------------|
| No Infection vs<br>Infection ZA inject | n2 = 0.782 | 5 | 0.0160 | <b>0.012</b> | <b>0.023</b> |
|----------------------------------------|------------|---|--------|--------------|--------------|

532

533 We also collected Alpha diversity reports for 20 individuals for 21 dpi (Table 4;

534 Supplementary Documents; Fig. 11).

535

536

537

538

539

540

541

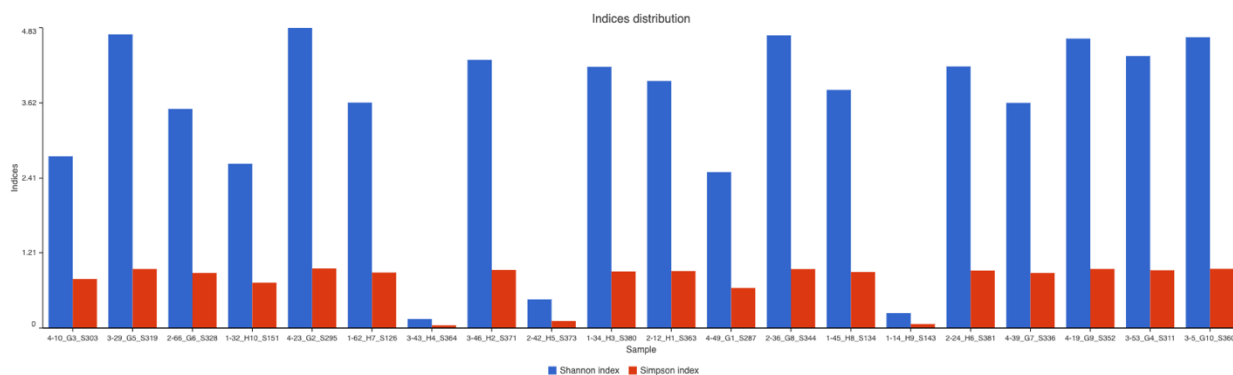

542

543 **Fig. 11. Shannon and Simpson indices of 21dpi.** Alpha diversity reports depicted by

544 Shannon and Simpson distribution indices for 20 samples of 21dpi. The first number

545 before each sample ID identifies the treatment type (1 = No infection, 2 = Infection only,

546 3 = Infection ZA inject, and 4 = Infection AB inject).

547

548 Species richness and diversity for non-infected controls, infected wethers, infected ZA

549 injected wethers, and infected AB injected wethers indicated significant differences

550 between 7dpi and 21 dpi microbial composition. This contrasts with 21 dpi where there are

551 no significant differences when comparisons are made between non-infected and infected

552 wethers (ZA/AB injected or not). This supports literature where the total bacterial load

553 increases over time after infection with *H. contortus* [8].

554



555 Infection likely has a broad range of quantitative biological effects on each host. Our  
556 investigation of the composition of microbial flora shows a more similar pattern to other  
557 studies that support the notion as to why a host is better suited to withstand intrusion by  
558 external threats. The richer and more diverse the microbiota, the better the host may combat  
559 external pathogens [12]. The Alpha diversity report, depicting Shannon and Simpson  
560 distribution indices, identifies that treatments for 21 dpi (Table 5; Supplementary  
561 Documents), when compared with each other do not show significance. The non-infected  
562 wethers appear to have developed a pronounced, non-infected version of an abundant and  
563 diverse microbial flora. Thus, when infected 21 dpi wethers are statistically compared to  
564 non-infected 21 dpi controls for abundance and diversity using Alpha diversity reports with  
565 Shannon and Simpson distribution indices, there are no significant differences.

566

567 However, when comparing Shannon and Simpson Alpha indices between 7 dpi and 21 dpi  
568 (Table 6) there are significant differences. The Shannon indices for 7 dpi vs 21 dpi t-Test:  
569 Two-Sample Assuming Unequal Variances results showed that there are significant  
570 differences between the different treatment groups. There are differences between “non-  
571 infected” wethers based on age alone. Table 5 shows that there are significant differences  
572 between comparisons between “non-infected” wethers for 7 dpi and those wethers that  
573 were “non-infected” for 21dpi, only “infected” for 21 dpi, “infected” with ZA injection for  
574 21 dpi, and “infected” with an AB injection for 21 dpi. Therefore, it is evident that the  
575 richness and diversity for microbial flora in blood changes over time, regardless of the  
576 treatment. Further evidence supports this when examining wethers subjected to “infection”  
577 only for 7 dpi as compared to those with “non-infected” 21 dpi following inoculation,  
578 “infection” with ZA injection for 21dpi, and “infection” with an AB injection for 21 dpi.  
579 This is further support that despite the condition, as the age of the wethers increases (dpi),  
580 there are significant changes in the richness and diversity of microbial flora in the blood.

581

582 **Table 6. Statistically different comparison results of 7 dpi versus 21 dpi.** Statistically  
583 different comparison results of 7 dpi versus 21 dpi a) Shannon and b) Simpson distribution  
584 indices for Alpha diversity reports of abundance and diversity for microbial flora in host  
585 *Capra hircus* wethers.

586

587 a) Shannon index 7 dpi vs 21 dpi t-Test: Two-Sample Assuming Unequal Variances

| Sample Comparisons                                          | Mean                    | Sample Size (n) | Sample Variance (s) | P(T<=t) one-tail | P(T<=t) two-tail |
|-------------------------------------------------------------|-------------------------|-----------------|---------------------|------------------|------------------|
| No Infection 7 dpi<br>vs<br>No Infection 21 dpi             | n1 = 1.05<br>n2 = 2.91  | 5<br>5          | 0.562<br>2.56       | <b>0.029</b>     | 0.057            |
| No Infection 7 dpi<br>vs<br>Infection only 21 dpi           | n1 = 1.05<br>n2 = 3.37  | 5<br>5          | 0.562<br>2.83       | <b>0.015</b>     | <b>0.031</b>     |
| No Infection 7 dpi<br>vs<br>Infection ZA inject<br>21 dpi   | n1 = 1.05<br>n2 = 3.65  | 5<br>5          | 0.562<br>3.86       | <b>0.020</b>     | <b>0.040</b>     |
| No Infection 7 dpi<br>vs<br>Infection AB inject<br>21 dpi   | n1 = 1.05<br>n2 = 3.67  | 5<br>5          | 0.562<br>1.12       | <b>0.001</b>     | <b>0.003</b>     |
| Infection only 7 dpi<br>vs<br>No Infection 21 dpi           | n1 = 0.707<br>n2 = 2.91 | 5<br>5          | 0.714<br>2.56       | <b>0.017</b>     | <b>0.035</b>     |
| Infection only 7 dpi<br>vs<br>Infection only 21 dpi         | n1 = 0.707<br>n2 = 3.37 | 5<br>5          | 0.714<br>2.83       | <b>0.010</b>     | <b>0.020</b>     |
| Infection only 7 dpi<br>vs<br>Infection ZA inject<br>21 dpi | n1 = 0.707<br>n2 = 3.65 | 5<br>5          | 0.714<br>3.86       | <b>0.014</b>     | <b>0.028</b>     |
|                                                             | n1 = 0.707              | 5               | 0.714               | <b>0.001</b>     | <b>0.001</b>     |

|                                                                 |           |   |       |              |       |
|-----------------------------------------------------------------|-----------|---|-------|--------------|-------|
| Infection only 7dpi<br>vs<br>Infection AB inject<br>21 dpi      | n2 = 3.67 | 5 | 1.12  |              |       |
| Infection ZA inject<br>7dpi vs<br>Infection AB inject<br>21 dpi | n1 = 2.47 | 5 | 0.718 | <b>0.041</b> | 0.082 |
|                                                                 | n2 = 3.67 | 5 | 1.12  |              |       |
| Infection AB inject<br>7dpi vs Infection AB<br>inject 21 dpi    | n1 = 1.77 | 3 | 1.60  | <b>0.047</b> | 0.094 |
|                                                                 | n2 = 3.67 | 5 | 1.12  |              |       |

588

Simpson index 7dpi vs 21 dpi t-Test: Two-Sample Assuming Unequal Variances

| Sample Comparisons                                       | Mean       | Sample Size (n) | Sample Variance (s) | P(T<=t) one-tail | P(T<=t) two-tail |
|----------------------------------------------------------|------------|-----------------|---------------------|------------------|------------------|
| No Infection 7 dpi<br>vs Infection AB<br>inject 21 dpi   | n1 = 0.390 | 5               | 0.0685              | <b>0.007</b>     | <b>0.013</b>     |
|                                                          | n2 = 0.845 | 5               | 0.0172              |                  |                  |
| Infection only 7 dpi<br>vs No<br>Infection 21 dpi        | n1 = 0.196 | 5               | 0.0522              | <b>0.017</b>     | <b>0.034</b>     |
|                                                          | n2 = 0.699 | 5               | 0.132               |                  |                  |
| Infection only 7 dpi<br>vs Infection only 21<br>dpi      | n1 = 0.196 | 5               | 0.0522              | <b>0.011</b>     | <b>0.022</b>     |
|                                                          | n2 = 0.758 | 5               | 0.130               |                  |                  |
| Infection only 7 dpi<br>vs Infection ZA<br>inject 21 dpi | n1 = 0.196 | 5               | 0.0522              | <b>0.017</b>     | <b>0.034</b>     |
|                                                          | n2 = 0.762 | 5               | 0.161               |                  |                  |

|                                                         |            |   |        |              |              |
|---------------------------------------------------------|------------|---|--------|--------------|--------------|
| Infection only 7dpi<br>vs Infection AB<br>inject 21 dpi | n1 = 0.196 | 5 | 0.0522 | <b>0.001</b> | <b>0.002</b> |
|---------------------------------------------------------|------------|---|--------|--------------|--------------|

589

590

591 Gene amplicons for 16S rRNA Relative Abundance profiles are illustrated for 18  
592 individuals on 7dpi (Fig. 12). The blood samples are dominated by 31 most abundant  
593 operational taxonomic units (OTUs).

594

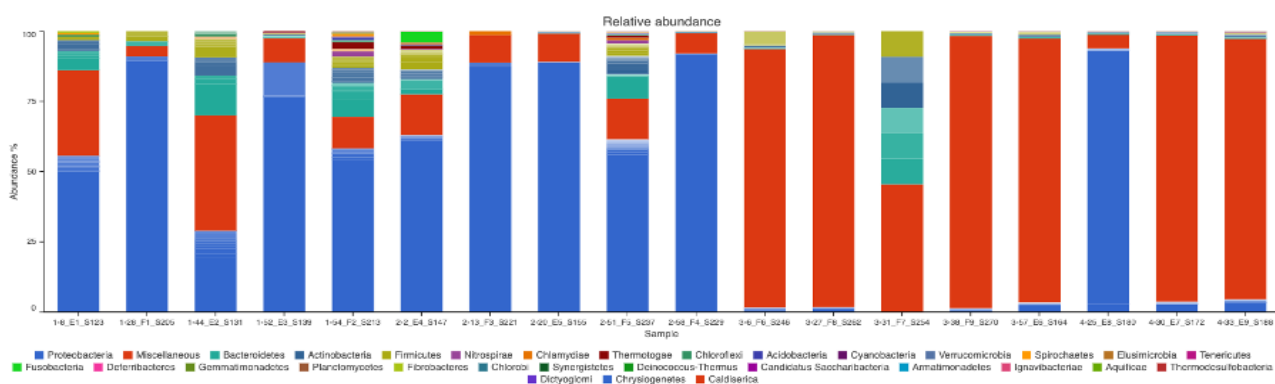

595

596 **Fig. 12. Relative Abundance of OTUs on 7 dpi for 18 samples.** The first number  
597 before each sample ID identifies the treatment type (1 = No infection, 2 = Infection only,  
598 3 = Infection ZA inject, and 4 = Infection AB inject).

599

600 We identify that Fig. 12, illustrates the Relative Abundance of OTU profiles on 7 dpi that  
601 follow the approximate total “Mean” profile percentage of the most abundant phylum  
602 being *Proteobacteria* (~84.16%) (Table 7).

603

604 **Table 7. OTU percentage composition.** OTU percentage composition of the most  
605 prevalent Phylum after 7 days post inoculation (*Proteobacteria*).

606

| Seven (7) days post inoculation |                                       |              |
|---------------------------------|---------------------------------------|--------------|
| Sample Number                   | <i>Proteobacteria</i> (% Composition) | Treatment    |
| 1-8_E1_S123                     | 76.0                                  | No Infection |
| 1-28_F1_S205                    | 94.6                                  | No Infection |

|                            |             |                     |
|----------------------------|-------------|---------------------|
| 1-44_E2_S131               | 54.2        | No Infection        |
| 1-52_E3_S139               | 94.3        | No Infection        |
| 1-54_F2_S213               | 61.0        | No Infection        |
| <b>Mean No Infection</b>   | <b>76.0</b> |                     |
| 2-2_E4_S147                | 73.7        | Infection only      |
| 2-13_F3_S221               | 94.4        | Infection only      |
| 2-20_E5_S155               | 97.2        | Infection only      |
| 2-51_F5_S237               | 67.8        | Infection only      |
| 2-58_F4_S229               | 98.3        | Infection only      |
| <b>Mean Infection only</b> | <b>86.3</b> |                     |
| 3-6_F6_S246                | 90.2        | Infection ZA inject |
| 3-27_F8_S262               | 95.4        | Infection ZA inject |
| 3-31_F7_S254               | 45.5        | Infection ZA inject |
| 3-38_F9_S270               | 95.2        | Infection ZA inject |
| 3-57_E6_S164               | 93.5        | Infection ZA inject |
| <b>Mean ZA inject</b>      | <b>84.0</b> |                     |
| 4-25_E8_S180               | 95.8        | Infection AB inject |
| 4-30_E7_S172               | 94.2        | Infection AB inject |
| 4-33_E9_S188               | 93.5        | Infection AB inject |
| <b>Mean AB inject</b>      | <b>94.5</b> |                     |

607

608 **Table 8. Statistical comparison of *Proteobacteria* of 7 dpi.** Statistical comparison of  
 609 *Proteobacteria* (% Composition) after seven (7) dpi in host *Capra hircus* wethers.

*Proteobacteria* (% Composition) Seven Days Post Inoculation

| Sample Comparisons                  | Mean        | Sample Size (n) | Sample Variance (s) | P(T<=t) first-tail | P(T<=t) second-tail |
|-------------------------------------|-------------|-----------------|---------------------|--------------------|---------------------|
| No Infection vs Infection AB inject | n1 = 76.026 | 5               | 346.0               | <b>0.046</b>       | 0.091               |
|                                     | n2 = 94.51  | 3               | 1.374               |                    |                     |

610

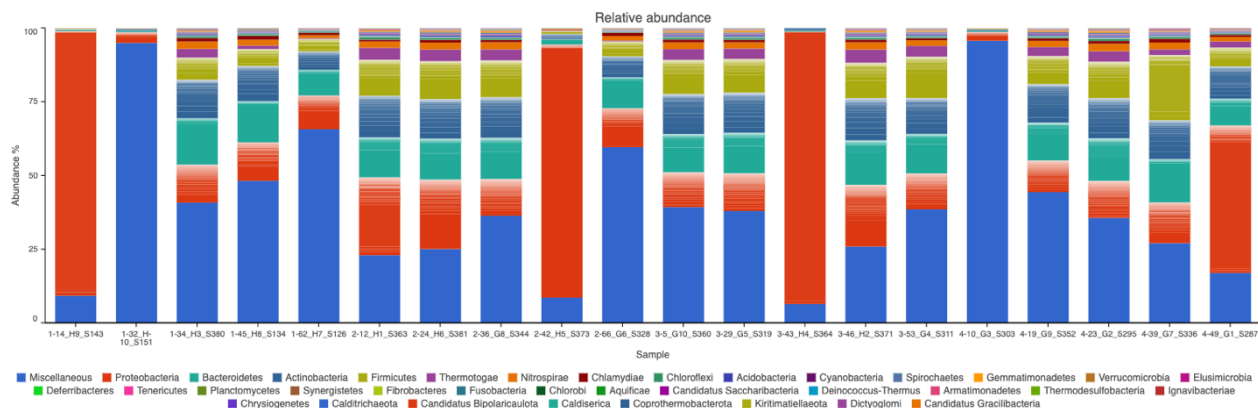

611

612

613 **Fig. 13. Relative Abundance of OTUs on 21 dpi for 20 samples.** The first number

614 before each sample ID identifies the treatment type (1 = No infection, 2 = Infection only,

615 3 = Infection ZA inject, and 4 = Infection AB inject).

616

617 Gene amplicons for 16S rRNA Relative Abundance of OTU profiles are illustrated for 20

618 individuals on 21 dpi (Fig. 13). The blood samples are dominated by 36 most abundant

619 OTUs.

620

621 The 21 dpi blood samples accounted for a much more quantified and rich pool of OTUs

622 compared to that of 7 dpi blood samples.

623

624 **Table 9. OTU percentage composition of 21 dpi.** OTU percentage composition of the

625 most prevalent Phylums after 21 days post inoculation (*Proteobacteria*, *Bacteroidetes*,

626 *Actinobacteria*, and *Firmicutes*).

627

| 21 days post inoculation |                                         |                                        |                                         |                                     |              |  |
|--------------------------|-----------------------------------------|----------------------------------------|-----------------------------------------|-------------------------------------|--------------|--|
| Sample Number            | <i>Proteobacteria</i><br>(%Composition) | <i>Bacteroidetes</i><br>(%Composition) | <i>Actinobacteria</i><br>(%Composition) | <i>Firmicutes</i><br>(%Composition) | Treatment    |  |
| 1-14_H9_S143             | 97.6                                    | 0.360                                  | 0.460                                   | 0.350                               | No Infection |  |
| 1-32_H10_S151            | 92.5                                    | 0.500                                  | 0.800                                   | 0.290                               | No Infection |  |
| 1-34_H3_S380             | 36.5                                    | 17.4                                   | 20.5                                    | 8.93                                | No Infection |  |
| 1-45_H8_S134             | 45.4                                    | 15.6                                   | 18.1                                    | 6.86                                | No Infection |  |
| 1-62_H7_S126             | 65.1                                    | 9.72                                   | 9.46                                    | 5.13                                | No Infection |  |

|                     |      |       |       |       |                     |
|---------------------|------|-------|-------|-------|---------------------|
| Mean No Infection   | 67.4 | 8.71  | 9.86  | 4.31  |                     |
| 2-12_H1_S363        | 33.1 | 15.6  | 21.4  | 13.7  | Infection only      |
| 2-24_H6_S381        | 32.6 | 15.9  | 20.4  | 14.3  | Infection only      |
| 2-36_G8_S344        | 32.4 | 16.0  | 20.7  | 14.0  | Infection only      |
| 2-42_H5_S373        | 92.0 | 2.00  | 2.61  | 1.15  | Infection only      |
| 2-66_G6_S328        | 60.9 | 11.6  | 10.8  | 6.16  | Infection only      |
| Mean Infection only | 50.2 | 12.2  | 15.2  | 9.87  |                     |
| 3-5_G10_S360        | 34.6 | 15.0  | 20.0  | 13.1  | Infection ZA inject |
| 3-29_G5_S319        | 34.1 | 15.7  | 20.6  | 12.9  | Infection ZA inject |
| 3-43_H4_S364        | 94.6 | 0.410 | 1.040 | 0.410 | Infection ZA inject |
| 3-46_H2_S371        | 29.8 | 17.2  | 21.7  | 13.6  | Infection ZA inject |
| 3-53_G4_S311        | 34.8 | 15.3  | 18.8  | 15.3  | Infection ZA inject |
| Mean ZA inject      | 45.6 | 12.7  | 16.4  | 11.1  |                     |
| 4-10_G3_S303        | 91.5 | 0.380 | 0.860 | 0.390 | Infection AB inject |
| 4-19_G9_S352        | 40.5 | 14.5  | 19.2  | 10.9  | Infection AB inject |
| 4-23_G2_S295        | 30.9 | 16.5  | 21.1  | 13.9  | Infection AB inject |
| 4-39_G7_S336        | 22.9 | 16.5  | 20.7  | 23.6  | Infection AB inject |
| 4-49_G1_S287        | 55.7 | 10.1  | 15.6  | 7.24  | Infection AB inject |
| Mean AB inject      | 48.3 | 11.6  | 15.5  | 11.2  |                     |

628

629 There is clear evidence that greater amounts of difference are present when prolonged  
630 exposure to *H. contortus* infection are examined (7 dpi No Infection versus 21 dpi of all  
631 other treatments). *Proteobacteria* (Table 10: No Infection 7 dpi vs Infection only 21 dpi;

632 No Infection 7 dpi vs Infection ZA inject 21 dpi; and No Infection 7 dpi vs Infection AB  
 633 inject 21 dpi) shows the most significant values for relative abundance of OTUs.

634

635

636

637 **Table 10. Statistical comparison of *Proteobacteria* between 7 dpi and 21 dpi.** Statistical  
 638 comparison of *Proteobacteria* (% Composition) after seven (7) dpi versus 21 dpi of host  
 639 *Capra hircus* wethers.

*Proteobacteria* (% Composition) Seven dpi versus 21 dpi

| Sample Comparisons                               | Mean      | Sample Size (n) | Sample Variance (s) | P(T<=t) first-tail | P(T<=t) second-tail |
|--------------------------------------------------|-----------|-----------------|---------------------|--------------------|---------------------|
| No Infection 7 dpi vs Infection only 21 dpi      | n1 = 76.0 | 5               | 346.0               | <b>0.018</b>       | <b>0.036</b>        |
|                                                  | n2 = 50.2 | 5               | 696.0               |                    |                     |
| No Infection 7 dpi vs Infection ZA inject 21 dpi | n1 = 76.0 | 5               | 346.0               | <b>0.020</b>       | <b>0.040</b>        |
|                                                  | n2 = 45.6 | 5               | 756.0               |                    |                     |
| No Infection 7 dpi vs Infection AB inject 21 dpi | n1 = 76.0 | 5               | 346.0               | <b>0.009</b>       | <b>0.019</b>        |
|                                                  | n2 = 48.3 | 5               | 732.0               |                    |                     |

640

641 When a comparison of % Composition were made among 21 dpi treatments, there were  
 642 P(T<=t) first-tail values that were significant/near significant for *Firmicutes* (Table 14).

643 This implies agreement with the occurrence of inflammation [17] during parasite  
 644 intrusion.

645

646 **Table 11. Statistical comparison of *Proteobacteria* of 21 dpi.** Statistical comparison of  
 647 *Proteobacteria* (% Composition) after 21 dpi of host *Capra hircus* wethers.

*Proteobacteria* (% Composition) 21 dpi versus 21 dpi

| Sample Comparisons             | Mean      | Sample Size (n) | Sample Variance (s) | P(T<=t) first-tail | P(T<=t) second-tail |
|--------------------------------|-----------|-----------------|---------------------|--------------------|---------------------|
| No Infection vs Infection only | n1 = 67.4 | 5               | 747.0               | 0.170              | 0.340               |
|                                | n2 = 50.2 | 5               | 696.0               |                    |                     |
|                                | n1 = 67.4 | 5               | 747.0               | 0.122              | 0.244               |



|                                        |           |   |       |       |       |
|----------------------------------------|-----------|---|-------|-------|-------|
| No Infection vs<br>Infection ZA inject | n2 = 45.6 | 5 | 756.0 |       |       |
| No Infection vs<br>Infection AB inject | n1 = 67.4 | 5 | 747.0 | 0.150 | 0.299 |
|                                        | n2 = 48.3 | 5 | 733.0 |       |       |

648

649 **Table 12. Statistical comparison of *Bacteroidetes* of 21 dpi.** Statistical comparison of

650 *Bacteroidetes* (% Composition) after 21 dpi of host *Capra hircus* wethers

| <i>Bacteroidetes</i> (% Composition) 21 dpi versus 21 dpi |           |                 |                     |                    |                     |
|-----------------------------------------------------------|-----------|-----------------|---------------------|--------------------|---------------------|
| Sample Comparisons                                        | Mean      | Sample Size (n) | Sample Variance (s) | P(T<=t) first-tail | P(T<=t) second-tail |
| No Infection vs<br>Infection only                         | n1 = 8.71 | 5               | 65.3                | 0.232              | 0.464               |
|                                                           | n2 = 12.2 | 5               | 35.9                |                    |                     |
| No Infection vs<br>Infection ZA inject                    | n1 = 8.71 | 5               | 65.3                | 0.213              | 0.430               |
|                                                           | n2 = 12.7 | 5               | 48.0                |                    |                     |
| No Infection vs<br>Infection AB inject                    | n1 = 8.71 | 5               | 65.3                | 0.265              | 0.530               |
|                                                           | n2 = 11.6 | 5               | 37.0                |                    |                     |

651

652 **Table 13. Statistical comparison of *Actinobacteria* of 21 dpi.** Statistical comparison of

653 *Actinobacteria* (% Composition) after 21 dpi of host *Capra hircus* wethers.

| <i>Actinobacteria</i> (% Composition) 21 dpi versus 21 dpi |           |                 |                     |                    |                     |
|------------------------------------------------------------|-----------|-----------------|---------------------|--------------------|---------------------|
| Sample Comparisons                                         | Mean      | Sample Size (n) | Sample Variance (s) | P(T<=t) first-tail | P(T<=t) second-tail |
| No Infection vs<br>Infection only                          | n1 = 9.86 | 5               | 87.9                | 0.184              | 0.369               |
|                                                            | n2 = 15.2 | 5               | 68.5                |                    |                     |
| No Infection vs<br>Infection ZA inject                     | n1 = 9.86 | 5               | 87.9                | 0.142              | 0.283               |
|                                                            | n2 = 16.4 | 5               | 75.2                |                    |                     |
| No Infection vs<br>Infection AB inject                     | n1 = 9.86 | 5               | 87.9                | 0.174              | 0.349               |
|                                                            | n2 = 15.5 | 5               | 71.7                |                    |                     |

654

655

656 **Table 14. Statistical comparison of *Firmicutes* of 21 dpi.** Statistical comparison of  
 657 *Firmicutes* (% Composition) after 21 dpi of host *Capra hircus* wethers.

| <i>Firmicutes</i> (% Composition) 21 dpi versus 21 dpi |           |                 |                     |                    |                     |
|--------------------------------------------------------|-----------|-----------------|---------------------|--------------------|---------------------|
| Sample Comparisons                                     | Mean      | Sample Size (n) | Sample Variance (s) | P(T<=t) first-tail | P(T<=t) second-tail |
| No Infection vs Infection only                         | n1 = 4.31 | 5               | 15.1                | 0.0618             | 0.1237              |
|                                                        | n2 = 9.87 | 5               | 35.4                |                    |                     |
| No Infection vs Infection ZA inject                    | n1 = 4.31 | 5               | 15.1                | <b>0.0368</b>      | 0.0736              |
|                                                        | n2 = 11.1 | 5               | 36.3                |                    |                     |
| No Infection vs Infection AB inject                    | n1 = 4.31 | 5               | 15.1                | 0.076              | 0.153               |
|                                                        | n2 = 11.2 | 5               | 73.2                |                    |                     |

658  
 659 The “Mean” profile percentages of the most abundant phyla shown in Table 9 for “No  
 660 Infection” were *Proteobacteria* (~67.4%), followed by *Actinobacteria* (~9.86%),  
 661 *Bacteroidetes* (~8.71%), and *Firmicutes* (~4.31%) of all OTUs. The “Mean” profile  
 662 percentages of the most abundant phyla shown in Table 9 for “Infection only” were  
 663 *Proteobacteria* (~50.2%), followed by *Actinobacteria* (~15.2%), *Bacteroidetes* (~12.2%),  
 664 and *Firmicutes* (~9.87%) of all OTUs. The “Mean” profile percentages of the most  
 665 abundant phyla shown in Table 9 for infection ZA inject were *Proteobacteria* (~45.6%),  
 666 followed by *Actinobacteria* (~16.4%), *Bacteroidetes* (~12.7%), and *Firmicutes* (~11.1%)  
 667 of all OTUs. The “Mean” profile percentages of the most abundant phyla shown in Table  
 668 9 for Infection AB inject were *Proteobacteria* (~48.3%), followed by *Actinobacteria*  
 669 (~15.5%), *Bacteroidetes* (~11.6%), and *Firmicutes* (~11.2%) of all OTUs.

670  
 671 Table 15 shows the most statistically significant treatment values for *Firmicutes* %  
 672 Composition/*Bacteroidetes* % Composition (*F/B*) ratios. When comparing No Infection  
 673 versus the other treatments, statistical comparisons revealed that two treatments indicated  
 674 significant differences (\* = p < 0.05): No Infection 21 dpi vs Infection ZA inject 21 dpi  
 675 and No Infection 21 dpi vs Infection AB inject 21 dpi for the P(T<=t) first-tail.

676  
 677

678

679

680

681

682

683 **Table 15. Statistical comparison of *F/B* ratios.** Statistical comparison of *F/B* ratios %

684 Composition after 21 dpi in host *Capra hircus* wethers.

| <i>F/B</i> ratio 21 dpi versus 21 dpi |            |                 |                     |                    |                     |
|---------------------------------------|------------|-----------------|---------------------|--------------------|---------------------|
| Sample Comparisons                    | Mean       | Sample Size (n) | Sample Variance (s) | P(T<=t) first-tail | P(T<=t) second-tail |
| No Infection vs Infection ZA inject   | n1 = 0.606 | 5               | 0.044               | <b>0.015</b>       | <b>0.030</b>        |
|                                       | n2 = 0.898 | 5               | 0.010               |                    |                     |
| No Infection vs Infection AB inject   | n1 = 0.606 | 5               | 0.044               | <b>0.035</b>       | 0.070               |
|                                       | n2 = 0.948 | 5               | 0.085               |                    |                     |

685

686

687 The non-infected controls, after 21 dpi, revealed both less *Bacteroidetes* % Composition  
 688 and *Firmicutes* % Composition than did all the other treatments. There is a 0.494 ratio for  
 689 the “Mean” *Bacteroidetes* % Composition to *Firmicutes* % Composition, when non-  
 690 infected controls are examined. The “Infection only” treatments had a 0.809 ratio for the  
 691 “Mean” *Bacteroidetes* % Composition to *Firmicutes* % Composition. The treated ZA inject  
 692 had a ratio of 0.874 and the treated AB inject had a ratio of 0.966 “Mean” *Bacteroidetes* %  
 693 Composition to *Firmicutes* % Composition. This supports that there are measurable  
 694 outcomes that can differentiate metabolic healthy wethers from parasitically compromised  
 695 wethers based on changes in *Bacteroidetes* % Composition to *Firmicutes* % Composition  
 696 [17].

697

## 698 Discussion

699

700 To characterize the nematode-infected host-transcriptome, host-microbiome, we examined  
 701 the distribution of 19-7 dpi transcriptome sequencing (RNA-Seq; n = 40) samples and

702 microbial flora from 18- seven (7) dpi and 20- 21 dpi samples of four treatment types of  
703 16S rRNA sequencing (MiSeq, n= 80). We focused on whole-blood or buffy coat derived  
704 extractions of mbDNA [26,27,28] to discriminate among non-infected, metabolically  
705 healthy controls and infected types. We performed microbial assignments using Kraken  
706 [29] and transcriptome analysis using STAR [30], completing differential analysis using  
707 GSA [31]. Our data identified 7627 genes that were expressed and shows differences in  
708 association across treatment types on 7 dpi and 21 dpi in specific microbiota profiles.

709

710 The evidence determined in this study shows that blood-based microbial DNA (mbDNA)  
711 can be used to discriminate between a non-infected, metabolically healthy or a  
712 *Haemonchus contortus*-attacked *Capra hircus wethers* [32]. The evidence also shows that  
713 the microbiome changes in abundance and diversity over age (dpi), even within the interval  
714 of a few days [33,34,35,36,37], further supporting that microbial flora abundance and  
715 diversity is associated with metabolic health or the indication of non-infection [44].

716

717 Factors, including antibiotics, can change the composition of microbiota [38,39,40,41]  
718 often destroying the composition of beneficial microbes along with pathological ones.  
719 Thus, causing dysbiosis or the development of unwanted microbes [41,42,43, 44]. Thus,  
720 the residual infection condition is still evident despite antibiotic or other type of treatment,  
721 indicated by inflammatory results or an increase in ratio of inflammation causing microbial  
722 flora. We identified evidence that the composition of inflammatory microbiota increases  
723 with zoledronic acid or anti- $\gamma\delta$  T cells treatment. With a greater increase being exhibited  
724 by anti- $\gamma\delta$  T cells treatment.

725

726 Unlike the results described by a previous study where it was surmised that infection by *H.*  
727 *contortus* did not affect caprine microbial diversity [8], we identified that in goat blood  
728 samples there were likely significant differences based especially on treatment types. There  
729 is also likely significance in evidence that microbial abundance and diversity differences  
730 are dependent on age (days post inoculation).

731

732 Our results imply that there are differences in gene expression as subjects become older or  
733 are exposed to the environment longer. Attributes of the different treatment types show that  
734 genes are expressed in response to the *H. contortus* presence. All pointing towards the  
735 implication of *H. contortus* to effectively change and disrupt the internal habitat of the host.

736

737 The host health may be determined based on *Firmicutes/Bacteroidetes* (*F/B*) ratios. The *F/B*  
738 Ratio is estimated by utilizing the lowest and highest values of the reference range (uninfected  
739 host) for individual organisms [44]. A high *F/B* ratio may be related to increased caloric  
740 extraction from food, fat deposition and lipogenesis, impaired insulin sensitivity, and  
741 increased inflammation. Low *Firmicutes/Bacteroidetes* (*F/B*) ratio, is an indicator of  
742 dysbiosis indicated by a decreased diversity of the microbiome compared to healthy cohorts.  
743 *F/B* is considered as “low” when the value falls below a threshold [44]. Therefore, “metabolic  
744 health” is determined by the actions taken by the parasite. If the parasite yields an *F/B* ratio  
745 that is depressed compared to the reference range of harmful intrusion, it may be postulated  
746 that the host does not have adequate means of defending itself, thus the parasite load is  
747 depleting host resources. Alternatively, if the parasite yields an *F/B* ratio that is elevated  
748 compared to the reference range of harmful intrusion, it indicates that the host is being  
749 hyperactive or inflamed as a response to the parasite burden.

750

## 751 **Conclusions**

752

753 The metabolic systems affected warrant further investigation to identify specific pathways  
754 where significant changes have resulted based on being exposed to infection. Furthermore,  
755 the development of computational algorithms for correlation of microbial abundance and  
756 diversity are warranted. The authors conjecture that blood samples are shown here to be a  
757 possible means to indicate *H. contortus* infection based on detection of microbial flora  
758 abundance and diversity as well as in gene expression profiles. Correlations can be drawn  
759 on statistical levels of microbial flora for this specific type of inflammation. The specificity  
760 in the range of microbial flora, dependent on the age of the *wethers*, can indicate the  
761 occurrence of depleting resources or inflammation due to *H. contortus* infection. In other  
762 words, this implies *H. contortus* does effectively change and disrupt the internal habitat

763 health of the host and the effects are measurable. The development of a standard laboratory  
764 diagnostic procedure using blood microbiota to detect gastrointestinal infection with *H.*  
765 *contortus* is the ideal course of action.

766

767

768

769

770

#### 771 **Availability of data and materials**

772

773 The metagenomic data have been deposited with links to BioProject accession number  
774 PRJNA612987 in the NCBI BioProject database  
775 (<https://www.ncbi.nlm.nih.gov/bioproject/>).

776

777 The gene expression data discussed in this publication have been deposited in NCBI's  
778 Gene Expression Omnibus [45] and are accessible through GEO Series accession number  
779 GSE169607 (<https://www.ncbi.nlm.nih.gov/geo/query/acc.cgi?acc=GSE169607>).

780

#### 781 **Acknowledgements**

782

783 The author is thankful to coinvestigators Zaisen Wang, Qunhui Yang, and Jessica  
784 Quijada-Pinango and the Director of the American Institute for Goat research (AIGR:  
785 School of Agriculture and Applied Sciences, Langston University, Langston, Oklahoma,  
786 USA), Mrs. Kelly Kyle and Mrs. Xiaowen Wang (Partek Incorporated). The Relationship  
787 Between the Microbiome and Internal Parasitism in Goats is supported by the Evans  
788 Allen Program Grant at the Agricultural Research and Extension Center at Langston  
789 University.

790

791

792

793

794

795

796

797

798

### Literature Cited

799

800 [1] Laing R, T. Kikuchi, A. Martinelli, I. J. Tsai, R. N. Beech, E. Redman, N. Holroyd,  
801 D. J. Bartley, H. Beasley, C. Britton, D. Curran, E. Devaney, A. Gilabert, M. Hunt, F.  
802 Jackson, S. L. Johnston, I. Kryukov, K. Li, A. A. Morrison, A. J. Reid, N. Sargison, G. I.  
803 Saunders, J. D. Wasmuth, A. Wolstenholme, M. Berriman, J. S. Gilleard, and J. A.  
804 Cotton. 2013. The genome and transcriptome of *Haemonchus contortus*, a key model  
805 parasite for drug and vaccine discovery. *Genome Biology*, 14:R88.  
806 <http://genomebiology.com/2013/14/8/R88>.

807

808 [2] Sasser, J.N. and Freckman, D.W. 1987. A World Perspective on Nematology: The  
809 Role of the Society. In: Veech, J.A. and Dickson, D.W., Eds., *Vistas on Nematology*,  
810 Hyattsville, Maryland, 7-20.

811

812 [3] Mamun, Md. A. A, M. Sandeman, P. Rayment, P. Brook-Carter, E. Scholes, N.  
813 Kasinadhuni, D. Piedrafita, and A. R. Greenhill. 2020. Variation in gut bacterial  
814 composition is associated with *Haemonchus contortus* parasite infection of sheep.  
815 *Animal Microbiome*, 2:3. <https://doi.org/10.1186/s42523-020-0021-3>

816 [4] Mekonnen, S. M. 2007. Helminth Parasites of Sheep and Goats in Eastern  
817 Ethiopia: Epidemiology and Antihelminthic Resistance and its Management. Doctoral  
818 thesis Swedish University of Agricultural Sciences.

819

820 [5] Leite-Browning, M. L. 2006. *Haemonchus contortus* (Barber Pole Worm) Infestation  
821 in Goats. [www.aces.edu/urban](http://www.aces.edu/urban)).

822

- 823 [6] Barber's pole worm, wormboss. [www.wormboss.com/au/Sheep-](http://www.wormboss.com/au/Sheep-)  
824 [goats/worms/roundworm-barbers-pole-worm.php](http://www.wormboss.com/au/Sheep-goats/worms/roundworm-barbers-pole-worm.php). 2020, accessed Oct. 22, 2020.  
825
- 826 [7] Weinstock, J. V. and D. E. Elliott. 2009. Helminths and the IBD hygiene hypothesis.  
827 *Inflammatory Bowel Diseases*, 15:128-133.  
828
- 829 [8] Li, R. W., W. Li, J. Sun, P. Yu, R. L. Baldwin, and J. F. Urban. 2016. The effect of  
830 helminth infection on the microbial composition and structure of the caprine abomasal  
831 microbiome. *Scientific Reports*, 6:20606. 10.1038/srep20606  
832
- 833 [9] Gadahi, J. A., B. Yongqian, M. Ehsan, Z. Zhang, S. Wang, R. F. Yan, L. X. Xu, and  
834 Li, X. R. 2016. *Haemonchus contortus* excretory and secretory proteins (HcESPs)  
835 suppress functions of goat PBMCs in vitro. *Oncotarget*, 7(24):35670–35679.  
836 DOI:10.18632/oncotarget.9589  
837
- 838 [10] Li, C. J. and R. W. Li. 2008. Butyrate induced cell cycle arrest in bovine cells  
839 through targeting gene expression relevant to DNA replication apparatus. *Gene*  
840 *Relulation System Biology*, 2:113-23.  
841
- 842 [11] Zaiss, M. M., and Harris, N. L. 2016. Interactions between the intestinal microbiome  
843 and helminth parasites. *Parasite immunology*, 38(1):5–11.  
844 <https://doi.org/10.1111/pim.12274>  
845
- 846 [12] A. K. Pathak. 2017. Nutritional Bases to Control Gastrointestinal Parasites of  
847 Livestock. *Dairy and Veterinary Science Journal*, 4(2): 555632.  
848 doi: 10.19080/JDVS.2017.04.555632  
849
- 850 [13] Li, R. W., S. Wu, W. Li, Y. Huang, and L. C. Gasbarre. 2011. Metagenome  
851 plasticity of the bovine abomasal microbiota in immune animals in response to  
852 *Ostertagia ostertagi* infection. *PLoS One*, 6, e24417.



853

854 [14] Morales-delaNueza, C. Rodriguez, M. Santana, L. E. Hernandez-Castellano, T.  
855 Nino, R.J. Reyes-Cacon, I. Moreno-Indies, N. Castro, and J. Capote. 2012.  
856 Morphological measurements and indexes as a tool to support molecular genetic studies:  
857 an example in Canary Islands, *Journal of Applied Animal Research*, 40:3, 2015-221,  
858 DOI: 10.1080/09712119.2012.658062

859 [15] Powell, N. and T.T. MacDonald. 2017. Recent advances in gut immunology.  
860 *Parasite Immunology*, 39:e12430. DOI: 10.1111/pim.12430

861

862 [16] Ayaz, M. M., M. M. Nazir, N. Samad, M. Zubair, M. Hanif, M. Aziz, A. S. Sheikh,  
863 A. Akbar, A. Waheed, A. Zaman and N. Mahmood. 2018. Parasitism in Goats:  
864 Husbandry Management, Range Management, Gut Immunity and Therapeutics, Goat  
865 Science, Sándor Kukovics, *IntechOpen*, DOI: 10.5772/intechopen.74203

866

867 [17] Belkaid, Y., and T. W. Hand. 2014. Role of the microbiota in immunity and  
868 inflammation. *Cell*, 157(1):121–141. <https://doi.org/10.1016/j.cell.2014.03.011>

869

870 [18] Wagg, C., Schlaeppli, K., Banerjee, S. et al. 2019. Fungal-bacterial diversity and  
871 microbiome complexity predict ecosystem functioning. *Nature Communications*,  
872 10:4841. <https://doi.org/10.1038/s41467-019-12798-y>

873

874 [19] Zheng, D., Liwinski, T. and E. Elinav. 2020. Interaction between microbiota and  
875 immunity in health and disease. *Cell Research*, 30:492–506.  
876 <https://doi.org/10.1038/s41422-020-0332-7>

877

878 [20] Castillo, D.J., R.F. Rifkin, D.A. Cowan, and M. Potgieter. 2019. The Healthy  
879 Human Blood Microbiome: Fact or Fiction? *frontiers in Cellular and Infection*  
880 *Microbiology*, 9(148):1-12. doi:10.3389/fcimb.2019.00148

881

- 882 [21] Scarsella, e., M. Sandri, S.D. Monego, D. Licastro, and B.Stefanon. 2020. Blood  
883 Microbiome: A New Marker of Gut Microbial Population in Dogs? *Veterinary Sciences*,  
884 7(198):1-13. doi:10.3390/vetsci7040198
- 885
- 886 [22] Qiu, J., H. Zhou, Y. Jing, and C. Dong. 2019. Association between blood  
887 microbiome and type 2 diabetes mellitus: A nested case-control study. *Journal of*  
888 *Clinical Laboratory Analysis*, 33:e22842. <https://doi.org/10.1002/jcla.22842>
- 889
- 890 [23] Johnson, K. V. -A. and P. W. J. Burnet. 2016. Microbiome: Should we diversify  
891 from diversity? *Gut Microbes*, 7(6):455-458. doi: 10.1080/19490976.2016.1241933
- 892
- 893 [24] DeJong, TM. 1975. A comparison of three diversity indices based on their  
894 components of richness and evenness. *Oikos*, 26:222-7.  
895 <http://dx.doi.org/10.2307/3543712>
- 896
- 897 [25] Li, H., T Li, D. E. Beasley, P. Hedenec, Z. Xiao, S. Zhang, J. Li, Q. Lin, and X. Li.  
898 2016. Diet Diversity Is Associated with Beta but not Alpha Diversity of Pika Gut  
899 Microbiota. *Frontiers in Microbiology*, 7:1169. doi. 10.3389/fmicb.2016.01169
- 900
- 901 [26] Bettgowda, C. et al. 2014. Detection of circulating tumor DNA in early- and late-  
902 stage human malignancies. *Scientific Translations in Medicine*, 6:224ra24.
- 903
- 904 [27] Clark, T. A. et al. 2018. Analytical Validation of a Hybrid Capture-Based Next  
905 Generation Sequencing Clinical Assay for Genomic Profiling of Cell-Free Circulating  
906 Tumor DNA. *Journal of Molecular Diagnostics*, 20:686-702.
- 907
- 908 [28] Poore, G. D., E. Kopylova, Q. Zhu, C. Carpenter, S. Fraraccio, S. Wandro, T.  
909 Kosciolk, S. Janssen, J. Metcalf, S. J. Song, J. Kanbar, S. Miller-Montgomery, R.  
910 Heaton, R. Mckay, S.P. Patel, A.D. Swafford, & R. Knight. 2020. Microbiome analyses  
911 of blood and tissues suggest cancer diagnostic approach. *Nature*, 579(7800), 567–574.  
912 <https://doi.org/10.1038/s41586-020-2095-1>

913

914 [29] Wood, D.E., J. Lu, and B. Langmead. 2019. Improved metagenomic analysis with  
915 Kraken 2. *Genome Biology*, 20:257. <https://doi.org/10.1186/s13059-019-1891-0>

916

917 [30] Dobin, A. and T.R. Gingeras. 2015. Mapping RNA-seq Reads with STAR. *Current*  
918 *protocols in bioinformatics*, 51:11.14.1–11.14.19.

919 <https://doi.org/10.1002/0471250953.bi1114s51>

920

921 [31] Mathur, R., D. Rotroff, J. Ma, et al. 2018. Gene set analysis methods: a systematic  
922 comparison. *BioData Mining*, 11: 8. <https://doi.org/10.1186/s13040-018-0166-8>

923

924 [32] Gregory, D. P., E. Kopylova, Q. Zhu, C. Carpenter, S. Fraraccio, S. Wandro, T.  
925 Kosciolk, S. Janssen, J. Melcalf, S. J. Song, J. Kanbar, S. Miller-Montgomery, R.

926 Heaton, r. McKay, S. P. Patel, A. d. Swafford, and R. Knight. 2020. Microbiome analysis  
927 of blood and tissues suggest cancer diagnostic approach. *Nature*, 579(7800):567-574.

928 [doi:10.1038/s41586-020-2095-1](https://doi.org/10.1038/s41586-020-2095-1)

929

930 [33] McDonald D, E. Hyde, J.W. Debelius, J.T. Morton, A. Gonzalez, G. Ackermann,  
931 A.A. Aksenov, B. Behsaz, C. Brennan, Y. Chen, L. DeRight Goldasich, P.C. Dorrestein,  
932 R.R. Dunn, A.K. Fahimipour, J. Gaffney, J.A. Gilbert, G. Gogul, J.L. Green, P.

933 Hugenholtz, G. Humphrey, C. Huttenhower, M.A. Jackson, S. Janssen, D.V. Jeste, L.

934 Jiang, S.T. Kelley, D. Knights, T. Kosciolk, J. Ladau, J. Leach, C. Marotz, D.

935 Meleshko, A.V. Melnik, J.L. Metcalf, H. Mohimani, E. Montassier, J. Navas-Molina,

936 T.T. Nguyen, S. Peddada, P. Pevzner, K.S. Pollard, G. Rahnavard, A. Robbins-Pianka, N.

937 Sangwan, J. Shorestein, L. Smarr, S.J. Song, T. Spector, A.D. Swafford, V.G. Thackray,

938 L.R. Thompson, A. Tripathi, Y. Vázquez-Baeza, A. Vrbanc, P. Wischmeyer, E. Wolfe,

939 Q. Zhu, The American Gut Consortium, and R. Knight. 2018. American Gut: an open

940 platform for citizen science microbiome research. *mSystems* 3:e00031-18.

941 [doi:10.1128/mSystems.00031-18](https://doi.org/10.1128/mSystems.00031-18).

942

- 943 [34] G. Falony, M. Joossens, S. Vieira-Silva, J. Wang, Y. Darzi, K. Faust, A.  
944 Kurilshikov, M.J. Bonder, M. Valles-Colomer, D. Vandeputte, R.Y. Tito, S. Chaffron, L.  
945 Rymenans, C. Verspecht, L. De Sutter, G. Lima-Mendez, K. D'hoë, K. Jonckheere, D.  
946 Homola, R. Garcia, E.F. Tigchelaar, L. Eeckhaut, J. Fu, L. Henckaerts, A. Zhernakova,  
947 C. Wijmenga, and J. Raes. 2016. Population-level analysis of gut microbiome variation.  
948 *Science* 352:560–564. doi:10.1126/science.aad3503.
- 949
- 950 [35] A. Zhernakova, A. Kurilshikov, M.J. Bonder, E.F. Tigchelaar, M. Schirmer, T.  
951 Vatanen, Z. Mujagic, A.V. Vila, G. Falony, S. Vieira-Silva, J. Wang, F. Imhann, E.  
952 Brandsma, S.A. Jankipersadsing, M. Joossens, M.C. Cenit, P. Deelen, M.A. Swertz,  
953 LifeLines cohort study, R.K. Weersma, E.K.M. Feskens, M.G. Netea, D. Gevers, D.  
954 Jonkers, L. Franke, Y.S. Aulchenko, C. Huttenhower, J. Raes, M.H. Hofker, R.J. Xavier,  
955 C. Wijmenga, and J. Fu. 2016. Population-based metagenomics analysis reveals markers  
956 for gut microbiome composition and diversity. *Science* 352:565–569.  
957 doi:10.1126/science.aad3369.
- 958
- 959 [36] Rinninella E, Raoul P, Cintoni M, et al. 2019. What is the Healthy Gut Microbiota  
960 Composition? A Changing Ecosystem across Age, Environment, Diet, and  
961 Diseases. *Microorganism*, 2019;7(1):14. doi:10.3390/microorganisms7010014
- 962
- 963 [37] Huang, S., N. Haiminen, A.P. Carrieri, R. Hu, L. Jiang, L. Parida, B. Russell, C.  
964 Allaband, A. Zarrinpar, Y. Vázquez-Baeza, P. Belda-Ferre, H. Zhou, H.C. Kim, A.D.  
965 Swafford, R. Knight, and Z.Z. Xu. 2020. Human Skin, Oral, and Gut Microbiomes  
966 Predict Chronological Age. *mSystems*, 5(1), e00630-19.  
967 <https://doi.org/10.1128/mSystems.00630-19>
- 968
- 969 [38] Goodrich, J.K., J.L. Waters, A.C. Poole, J.L. Sutter, O. Koren, R. Blekhman, M.  
970 Beaumont, W. Van Treuren, R. knight, J. T. Bell, T.D. Spector, A.G. Clark, and R.E.  
971 Ley. 2014. Human genetics shape the gut microbiome. *Cell*, 2014, 159(4):789-799.
- 972

- 973 [39] Ley, R.E., F. Bäckhed, P. Turnbaugh, C.A. Lozupone, R.D. Knight, and J.I. Gordon.  
974 2005. Obesity alters gut microbial ecology. *Proceedings of the National Academy of*  
975 *Science*, 102(31):11070-11075.  
976
- 977 [40] Turnbaugh, P.J., M. Hanady, T. Yatsunencko, B.L. Cantarel, A. Duncan, R. E. Ley,  
978 M.L. Sogin, W.J. Jones, B.A. Roe, J.P. Affourtity, M. Egholm, B. Henrissat, A.C. Heath,  
979 R. Knight, and J.I. Gordon. 2009. A core gut microbiome in obese and lean twins.  
980 *Nature*, 457(7228):480-484.  
981
- 982 [41] Hasan, N. and H. Yang. 2019. Factors affecting the composition of the gut  
983 microbiota, and its modulation. *PeerJ*, 7:e7502. doi:10.7717/peerj.7502  
984
- 985 [42] Klingensmith, N.J. and C.m. Coopersmith. 2016. The Gut as the Motor of Multiple  
986 Organ Dysfunction in Crytical Illness. *Critical Care Clinics*, 32(2):203-212  
987
- 988 [43] Gee, X., C. Ding, W. Zhao, L. Xu, H. Tian, J. Gong, M. Zhu, J. Li, and N. li. 2017.  
989 Antibiotics-induced depletion of mice microbiota induces change in host secretonin  
990 biosynthesis and intestinal motility. *Journal of Translational Medicine*, 15(1):13.  
991
- 992 [44] Rowin, J., Y. Xia, B. Jung, and J. Sun. 2017. Gut inflammation and dysbiosis in  
993 human motor neuron disease. *Physiological reports*, 5(18), e13443.  
994 <https://doi.org/10.14814/phy2.13443>  
995
- 996 [45] Edgar, Ron et al. 2002. Gene Expression Omnibus: NCBI gene expression and  
997 hybridization array data repository. *Nucleic acids research*, 30(1): 207-10.  
998 doi:10.1093/nar/30.1.207  
999
- 1000
- 1001

1002 **Supplementary Documents**

1003

1004 **Table 2. Detailed Experimental Set-up.** The Group number, Treatment type, identifying

1005 Tag, days post inoculation (dpi), Age in days, and Body Weight (BW) in kg.

| Group | Treatment           | Tag/Sample ID | dpi | Age, days | BW, kg |
|-------|---------------------|---------------|-----|-----------|--------|
| 1     | No Infection        | 8_E1_S123     | 7   | 118       | 21.05  |
| 1     | No Infection        | 28_F1_S205    | 7   | 116       | 17.9   |
| 1     | No Infection        | 44_E2_S131    | 7   | 115       | 18.95  |
| 1     | No Infection        | 52_E3_S139    | 7   | 113       | 17.75  |
| 1     | No Infection        | 54_F2_S213    | 7   | 114       | 22.8   |
| 2     | Infection only      | 13_F3_S221    | 7   | 118       | 22.9   |
| 2     | Infection only      | 2_E4_S147     | 7   | 120       | 19.05  |
| 2     | Infection only      | 20_E5_S155    | 7   | 117       | 16.8   |
| 2     | Infection only      | 58_F4_S229    | 7   | 100       | 17.75  |
| 2     | Infection only      | 51_F5_S237    | 7   | 113       | 16.65  |
| 3     | Infection ZA inject | 6_F6_S246     | 7   | 119       | 17.65  |
| 3     | Infection ZA inject | 31_F7_S254    | 7   | 116       | 17.7   |
| 3     | Infection ZA inject | 27_F8_S262    | 7   | 116       | 20.9   |
| 3     | Infection ZA inject | 38_F9_S270    | 7   | 115       | 20.35  |
| 3     | Infection ZA inject | 57_E6_S164    | 7   | 96        | 19.7   |
| 4     | Infection AB inject | 17_F10_S18    | 7   | 117       | 16.8   |
| 4     | Infection AB inject | 25_E8_S180    | 7   | 116       | 19.95  |
| 4     | Infection AB inject | 33_E9_S188    | 7   | 116       | 19.8   |
| 4     | Infection AB inject | 30_E7_S172    | 7   | 116       | 19.7   |
| 4     | Infection AB inject | 50_E10_S9     | 7   | 114       | 21.65  |

1006

1007 **Table 3. Alpha diversity report for 7 dpi Shannon and Simpson index.**

1008

| Sample name  | Shannon index | Simpson index | dpi | treatment    |
|--------------|---------------|---------------|-----|--------------|
| 1-8_E1_S123  | 1.05          | 0.360         | 7   | No Infection |
| 1-28_F1_S205 | 0.190         | 0.0747        | 7   | No Infection |
| 1-44_E2_S131 | 2.05          | 0.772         | 7   | No Infection |
| 1-52_E3_S139 | 0.492         | 0.254         | 7   | No Infection |

|                                 |              |               |   |                     |
|---------------------------------|--------------|---------------|---|---------------------|
| 1-54_F2_S213                    | 1.49         | 0.487         | 7 | No Infection        |
| <b>Mean No Infection</b>        | <b>1.06</b>  | <b>0.3894</b> |   |                     |
| 2-13_F3_S221                    | 0.1607       | 0.061         | 7 | Infection only      |
| 2-2_E4_S147                     | 1.40         | 0.401         | 7 | Infection only      |
| 2-20_E5_S155                    | 0.0866       | 0.0198        | 7 | Infection only      |
| 2-58_F4_S229                    | 0.0535       | 0.0133        | 7 | Infection only      |
| 2-51_F5_S237                    | 1.828        | 0.486         | 7 | Infection only      |
| <b>Mean Infection only</b>      | <b>0.707</b> | <b>0.196</b>  |   |                     |
| 3-6_F6_S246                     | 1.58         | 0.591         | 7 | Infection ZA inject |
| 3-31_F7_S254                    | 1.61         | 0.800         | 7 | Infection ZA inject |
| 3-27_F8_S262                    | 2.86         | 0.823         | 7 | Infection ZA inject |
| 3-38_F9_S270                    | 3.52         | 0.940         | 7 | Infection ZA inject |
| 3-57_E6_S164                    | 2.77         | 0.757         | 7 | Infection ZA inject |
| <b>Mean Infection ZA inject</b> | <b>2.47</b>  | <b>0.782</b>  |   |                     |
| 4-25_E8_S180                    | 0.317        | 0.099         | 7 | Infection AB inject |
| 4-33_E9_S188                    | 2.64         | 0.733         | 7 | Infection AB inject |
| 4-30_E7_S172                    | 2.35         | 0.659         | 7 | Infection AB inject |
| <b>Mean Infection AB inject</b> | <b>1.770</b> | <b>0.497</b>  |   |                     |

1009

1010

1011 **Table 5. Alpha diversity report for 21 dpi Shannon and Simpson index.**

1012

| Sample name              | Shannon index | Simpson index | dpi | treatment      |
|--------------------------|---------------|---------------|-----|----------------|
| 1-14_H9_S143             | 0.240         | 0.0643        | 21  | No Infection   |
| 1-32_H10_S151            | 2.64          | 0.729         | 21  | No Infection   |
| 1-45_H8_S134             | 3.83          | 0.901         | 21  | No Infection   |
| 1-34_H3_S380             | 4.20          | 0.911         | 21  | No Infection   |
| 1-62_H7_S126             | 3.63          | 0.892         | 21  | No Infection   |
| <b>Mean No Infection</b> | <b>2.91</b>   | <b>0.699</b>  |     |                |
| 2-12_H1_S363             | 3.97          | 0.917         | 21  | Infection only |
| 2-24_H6_S381             | 4.21          | 0.925         | 21  | Infection only |
| 2-36_G8_S344             | 4.71          | 0.949         | 21  | Infection only |

|                          |       |        |    |                     |
|--------------------------|-------|--------|----|---------------------|
| 2-42_H5_S373             | 0.461 | 0.113  | 21 | Infection only      |
| 2-66_G6_S328             | 3.52  | 0.886  | 21 | Infection only      |
| Mean Infection only      | 3.37  | 0.758  |    |                     |
| 3-5_G10_S360             | 4.68  | 0.952  | 21 | Infection ZA inject |
| 3-29_G5_S319             | 4.72  | 0.950  | 21 | Infection ZA inject |
| 3-43_H4_S364             | 0.145 | 0.0438 | 21 | Infection ZA inject |
| 3-53_G4_S311             | 4.38  | 0.929  | 21 | Infection ZA inject |
| 3-46_H2_S371             | 4.31  | 0.934  | 21 | Infection ZA inject |
| Mean Infection ZA inject | 3.65  | 0.762  |    |                     |
| 4-10_G3_S303             | 2.76  | 0.789  | 21 | infection AB inject |
| 4-19_G9_S352             | 4.66  | 0.950  | 21 | infection AB inject |
| 4-23_G2_S295             | 4.83  | 0.958  | 21 | infection AB inject |
| 4-39_G7_S336             | 3.62  | 0.886  | 21 | infection AB inject |
| 4-49_G1_S287             | 2.51  | 0.644  | 21 | infection AB inject |
| Mean Infection AB inject | 3.68  | 0.845  |    |                     |

1013

1014



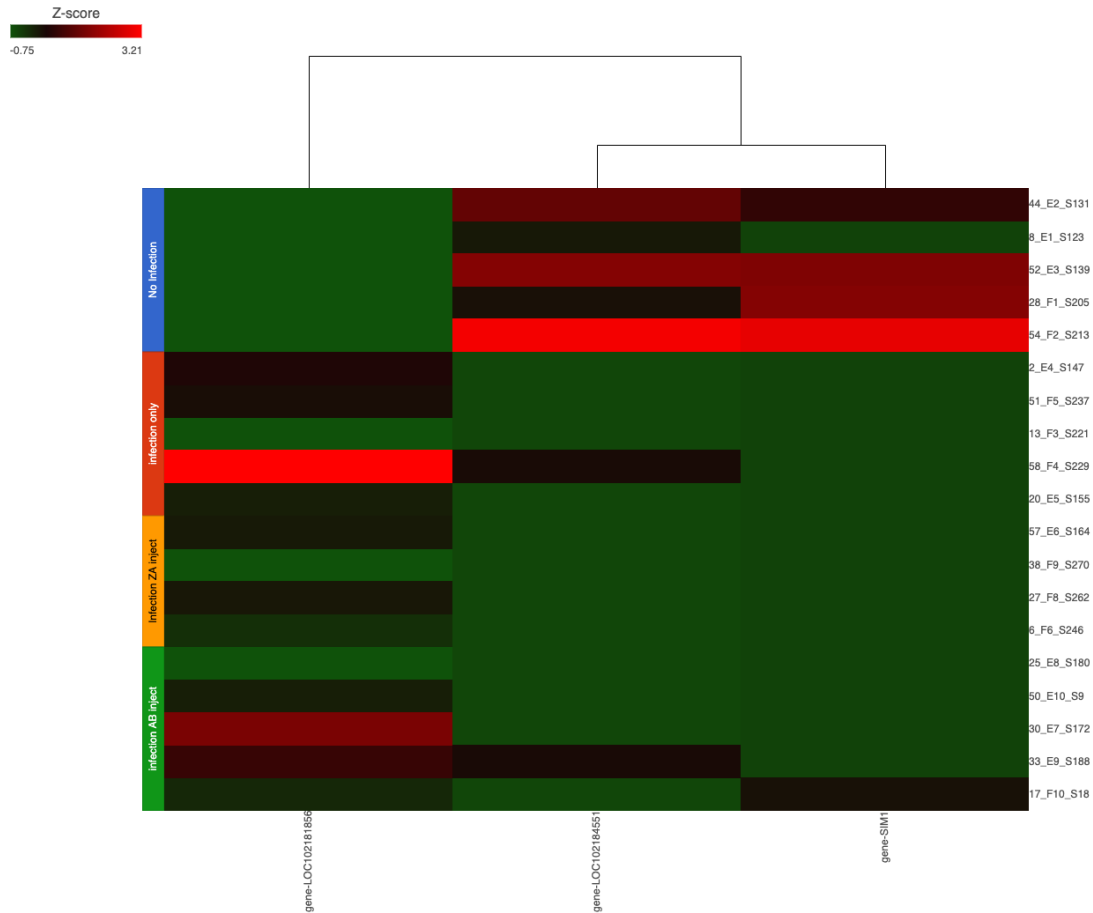

**Fig.1. Hierarchical clustering/heat map.** Three selected genes (identified at the bottom of the image) following differential analysis using GSA counts of 19/20 samples (identified on the right side of the image belonging to the described treatment group identified on the left side of the image) indicate the most likely significant genes ( $p < 0.05$ ) affecting samples when comparing No Infection samples to those that were only infected with the *H. contortus* pathogen, injected with zoledronic acid (ZA) or injected with antibodies (AB) and then infected with the *H. contortus* pathogen on 7 dpi.

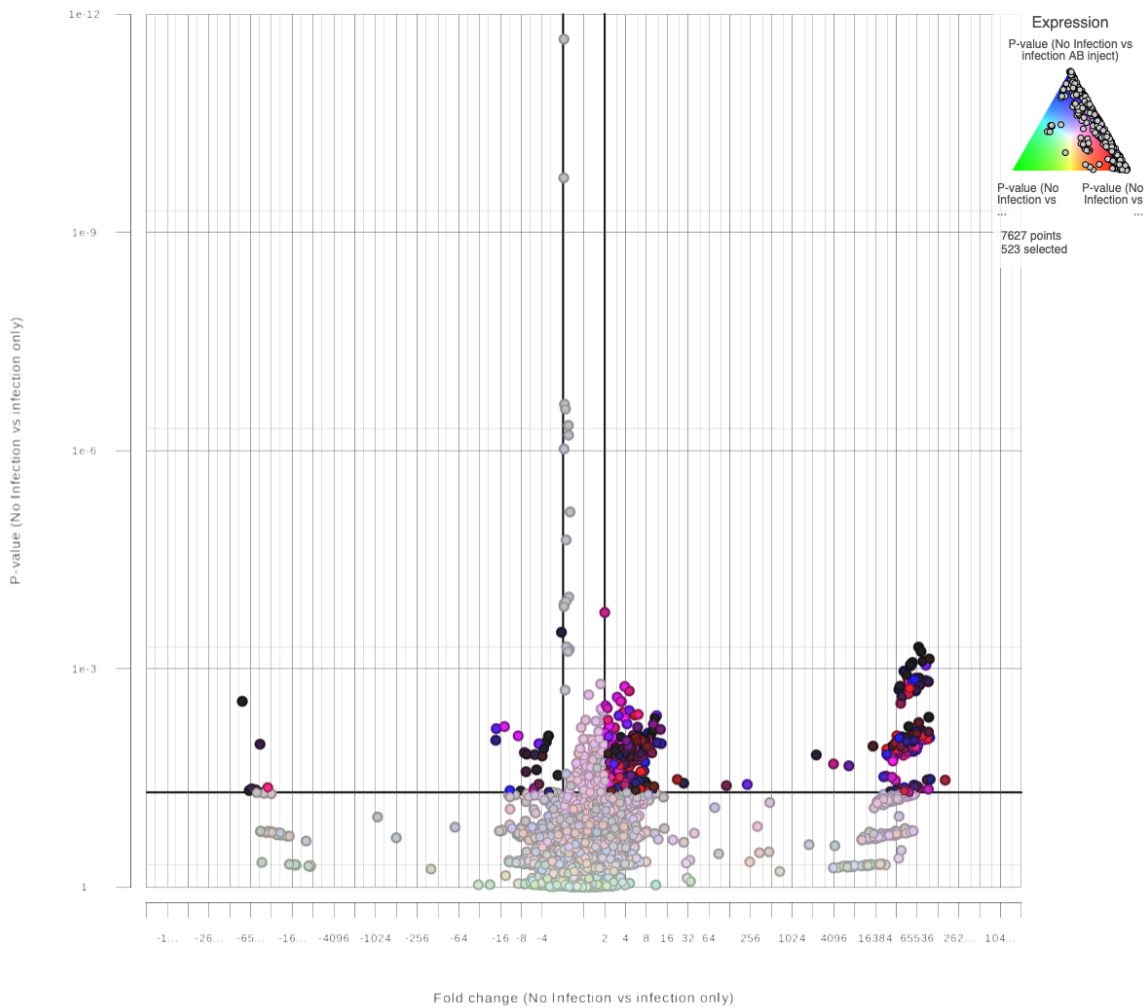

**Fig. 2. No Infection vs Infection only.** A Volcano plot for 19/20 blood samples indicating likely significant expression of genes ( $* = p < 0.05$ ) based on treatment type of *Capra hircus* following STAR alignment and GSA differential analysis for transcript sequences of 7627 identified genes expressed on 7 dpi. The fold change indicates downregulated ( $* = < -2$ ), no change (NC;  $* = > -2$ ,  $* = < 2$ ), and upregulated ( $* = > 2$ ) gene distribution when comparing No Infection samples to infection only samples when expressed against a Numeric Triad of P-values for No Infection vs Infection only (green), No Infection vs Infection ZA inject (red) and No Infection vs infection AB inject (blue).

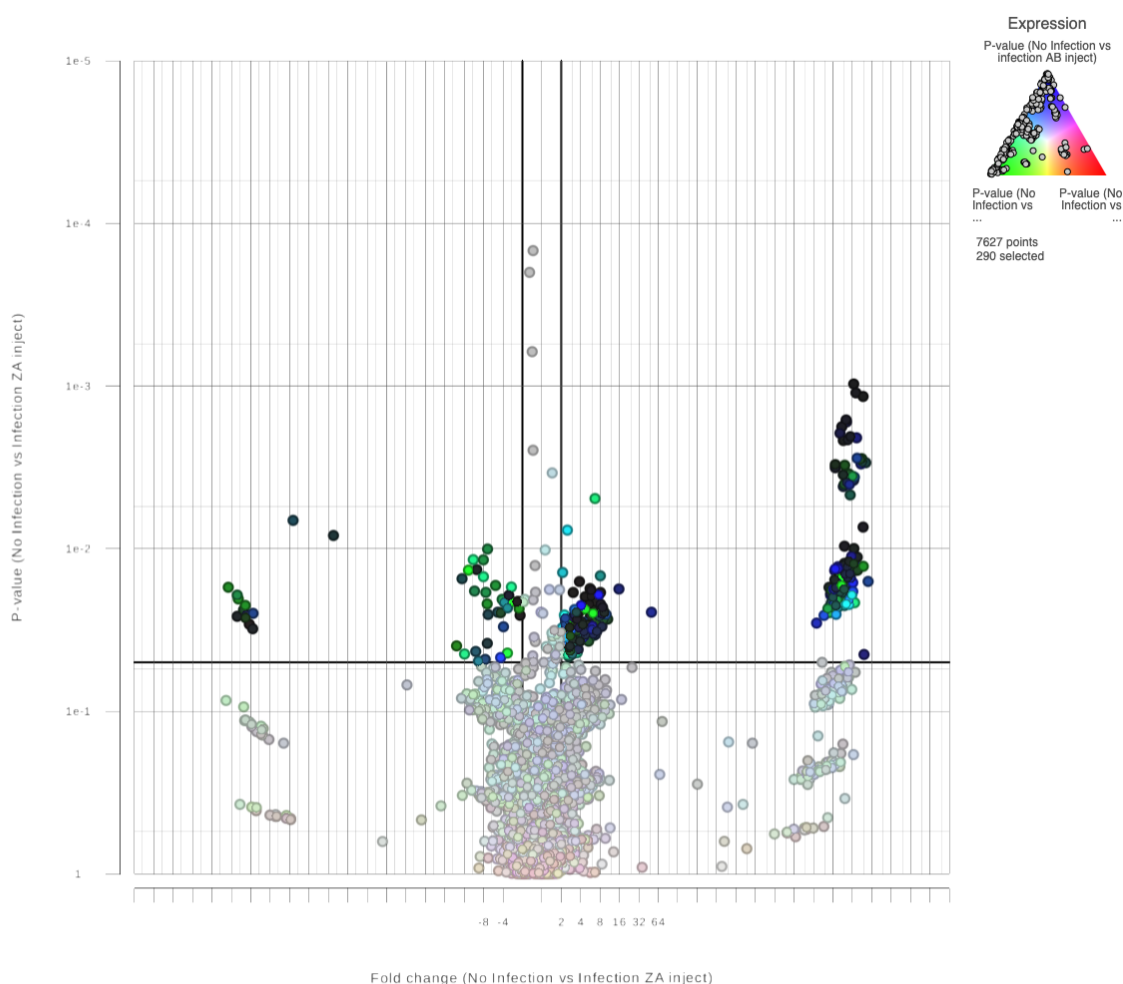

**Fig. 3. No Infection vs Infection ZA inject.** A Volcano plot for 19/20 blood samples indicating likely significant expression of genes ( $* = p < 0.05$ ) based on treatment type of *Capra hircus* following STAR alignment and GSA differential analysis for transcript sequences of 7627 identified genes expressed on 7 dpi. The fold change indicates downregulated ( $* = < -2$ ), no change (NC;  $* = > -2$ ,  $* = < 2$ ), and upregulated ( $* = > 2$ ) gene distribution when comparing No Infection samples to Infection ZA inject samples when expressed against a Numeric Triad of P-values for No Infection vs Infection only (green), No Infection vs Infection ZA inject (red) and No Infection vs infection AB inject (blue).

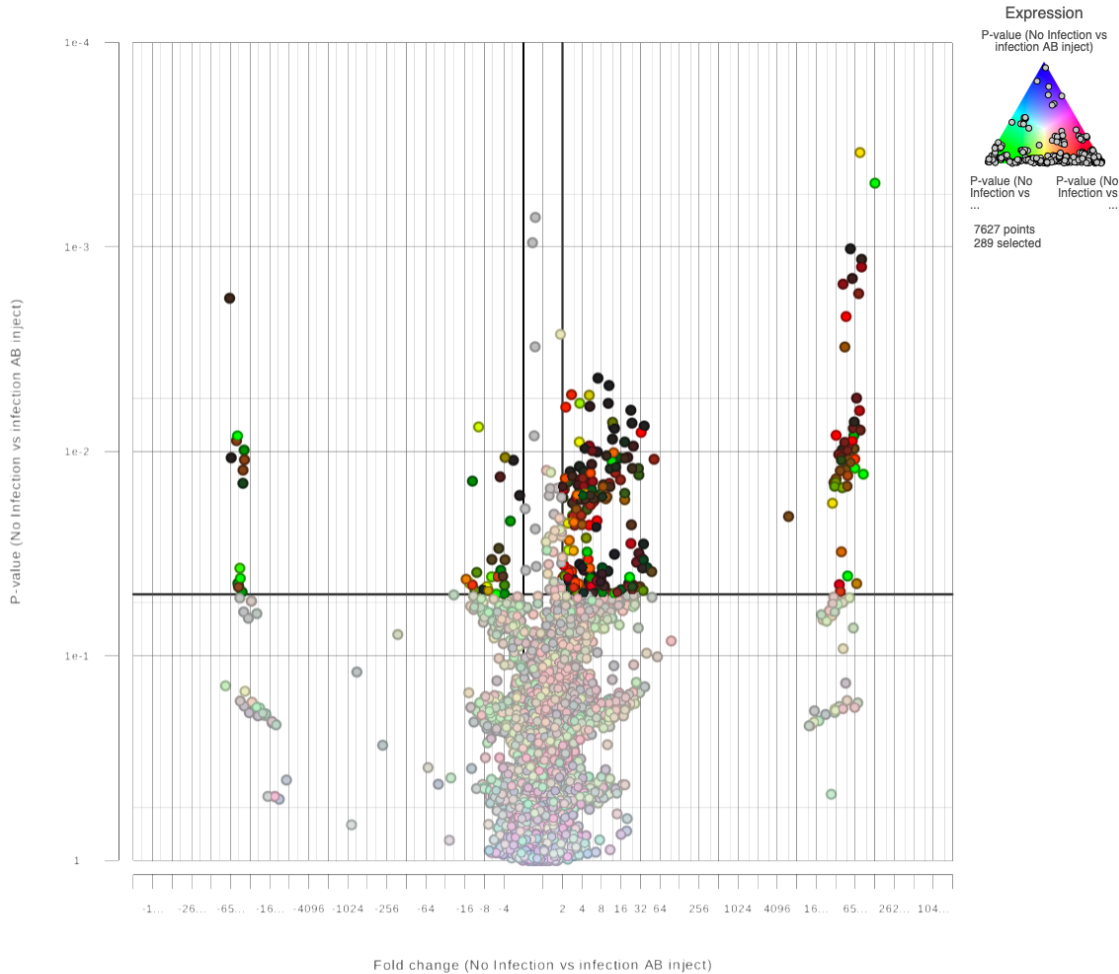

**Fig. 4. No Infection vs Infection AB inject.** A Volcano plot for 19/20 blood samples indicating likely significant expression of genes ( $* = p < 0.05$ ) based on treatment type of *Capra hircus* following STAR alignment and GSA differential analysis for transcript sequences of 7627 identified genes expressed on 7 dpi. The fold change indicates downregulated ( $* = < -2$ ), no change (NC;  $* = > -2$ ,  $* = < 2$ ), and upregulated ( $* = > 2$ ) gene distribution when comparing No Infection samples to infection AB inject samples when expressed against a Numeric Triad of P-values for No Infection vs Infection only (green), No Infection vs Infection ZA inject (red) and No Infection vs infection AB inject (blue).

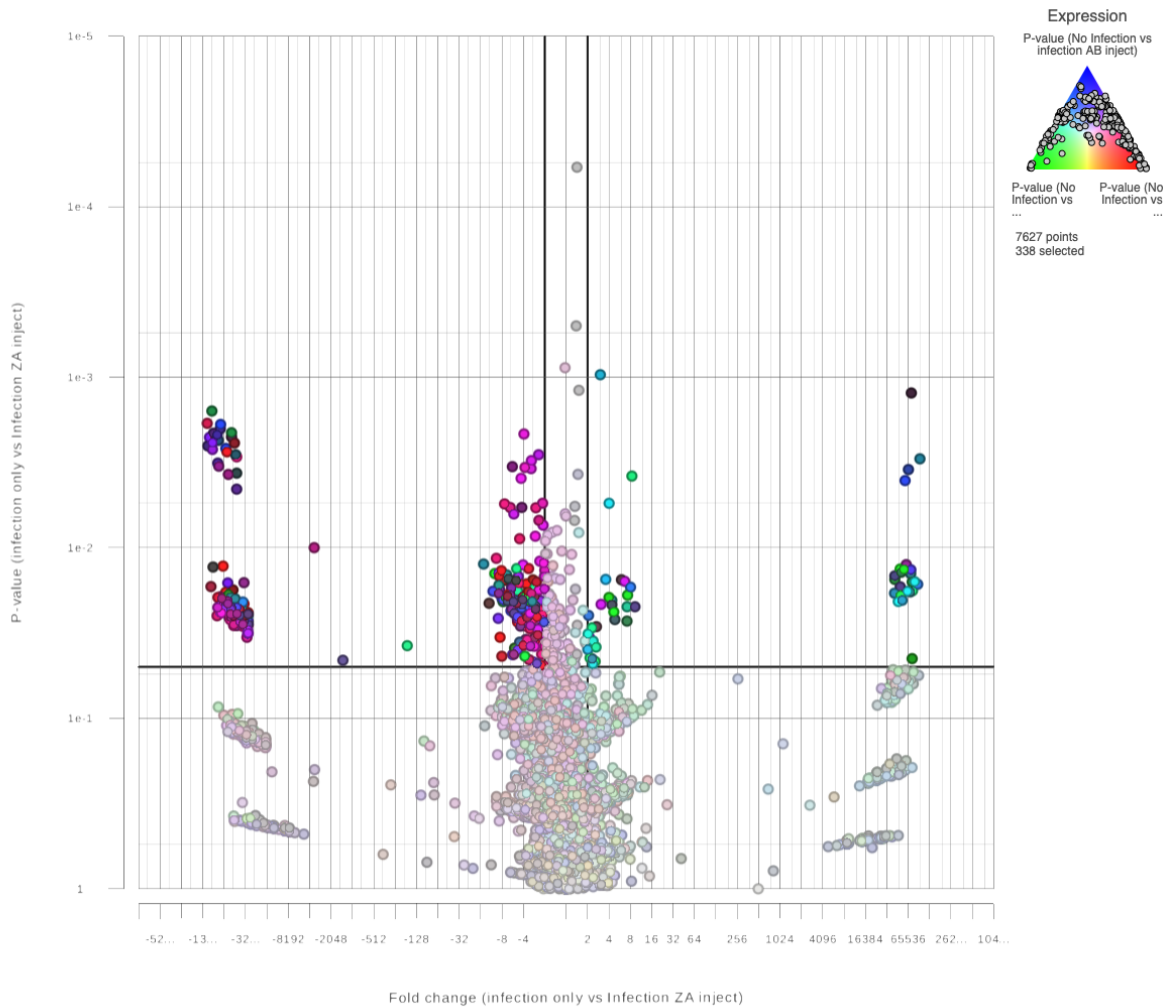

**Fig. 5. Infection only vs Infection ZA inject.** A Volcano plot for 19/20 blood samples indicating likely significant expression of genes ( $* = p < 0.05$ ) based on treatment type of *Capra hircus* following STAR alignment and GSA differential analysis for transcript sequences of 7627 identified genes expressed on 7 dpi. The fold change indicates downregulated ( $* = < -2$ ), no change (NC;  $* = > -2$ ,  $* = < 2$ ), and upregulated ( $* = > 2$ ) gene distribution when comparing infection only samples to Infection ZA inject samples when expressed against a Numeric Triad of P-values for No Infection vs Infection only (green), No Infection vs Infection ZA inject (red) and No Infection vs infection AB inject (blue).

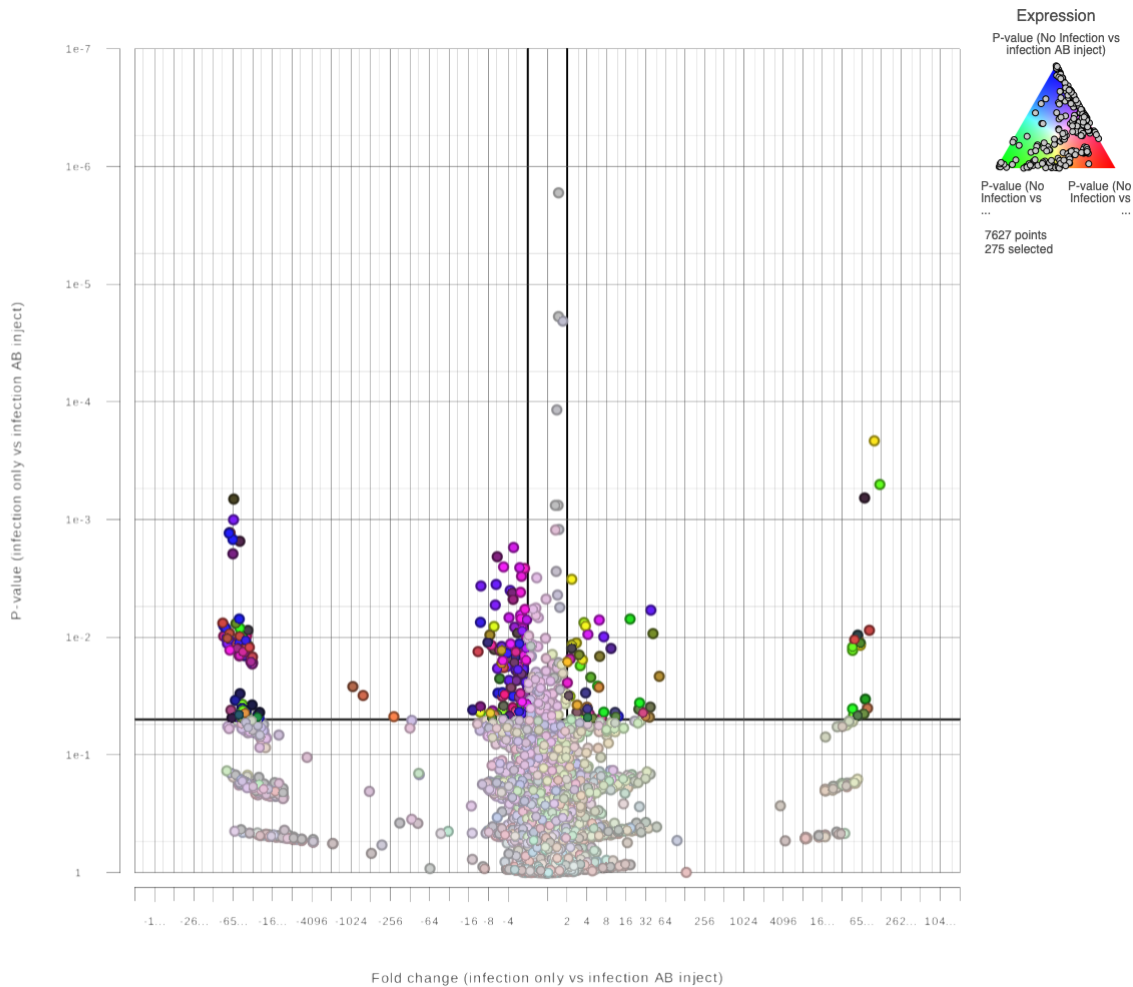

**Fig.6. Infection only vs Infection AB inject.** A Volcano plot for 19/20 blood samples indicating likely significant expression of genes ( $* = p < 0.05$ ) based on treatment type of *Capra hircus* following STAR alignment and GSA differential analysis for transcript sequences of 7627 identified genes expressed on 7 dpi. The fold change indicates downregulated ( $* = < -2$ ), no change (NC;  $* = > -2$ ,  $* = < 2$ ), and upregulated ( $* = > 2$ ) gene distribution when comparing infection only samples to infection AB inject samples when expressed against a Numeric Triad of P-values for No Infection vs Infection only (green), No Infection vs Infection ZA inject (red) and No Infection vs infection AB inject (blue).

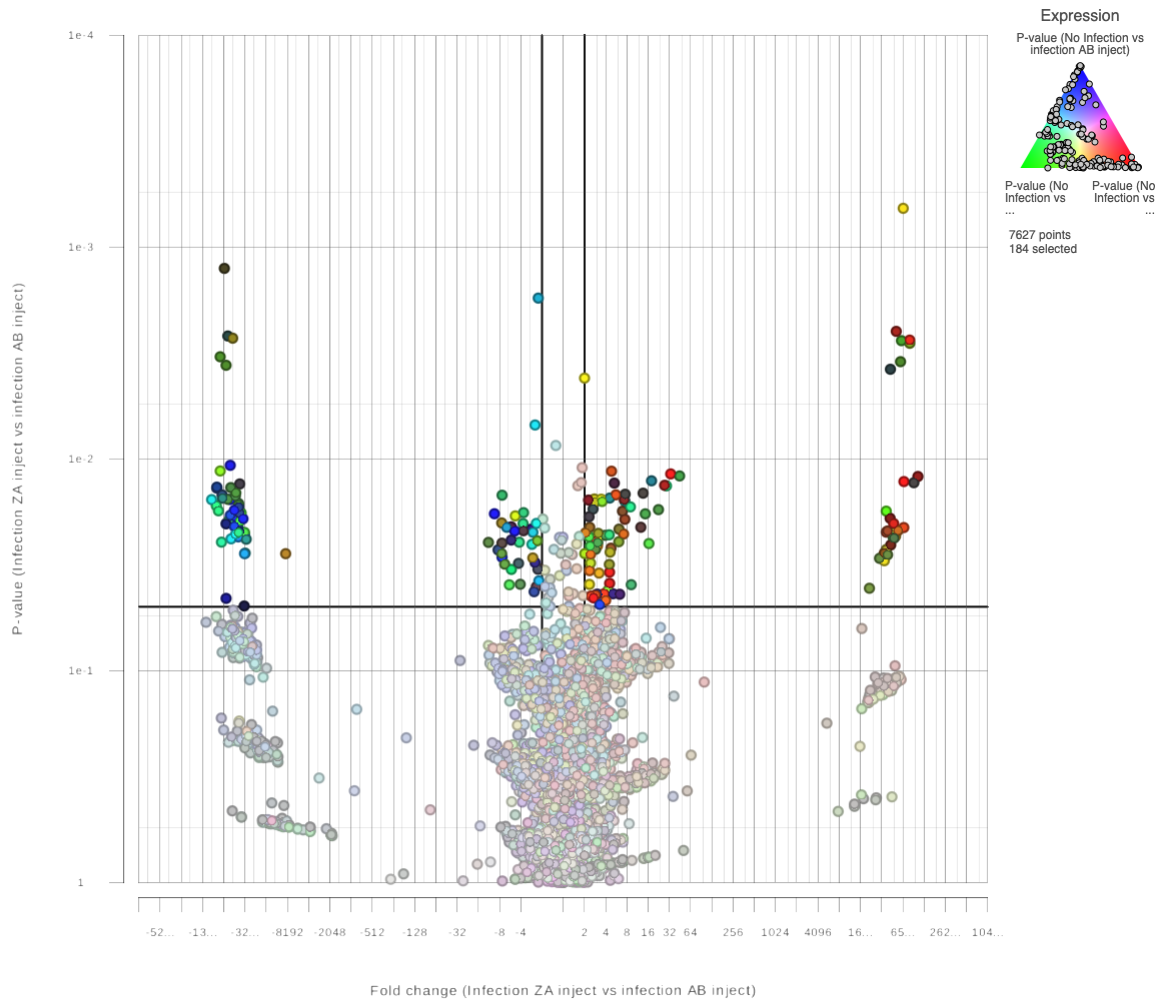

**Fig. 7. Infection ZA inject vs Infection AB inject.** A Volcano plot for 19/20 blood samples indicating likely significant expression of genes ( $* = p < 0.05$ ) based on treatment type of *Capra hircus* following STAR alignment and GSA differential analysis for transcript sequences of 7627 identified genes expressed on 7 dpi. The fold change indicates downregulated ( $* = < -2$ ), no change (NC;  $* = > -2$ ,  $* = < 2$ ), and upregulated ( $* = > 2$ ) gene distribution when comparing Infection ZA inject samples to infection AB inject samples when expressed against a Numeric Triad of P-values for No Infection vs Infection only (green), No Infection vs Infection ZA inject (red) and No Infection vs infection AB inject (blue).

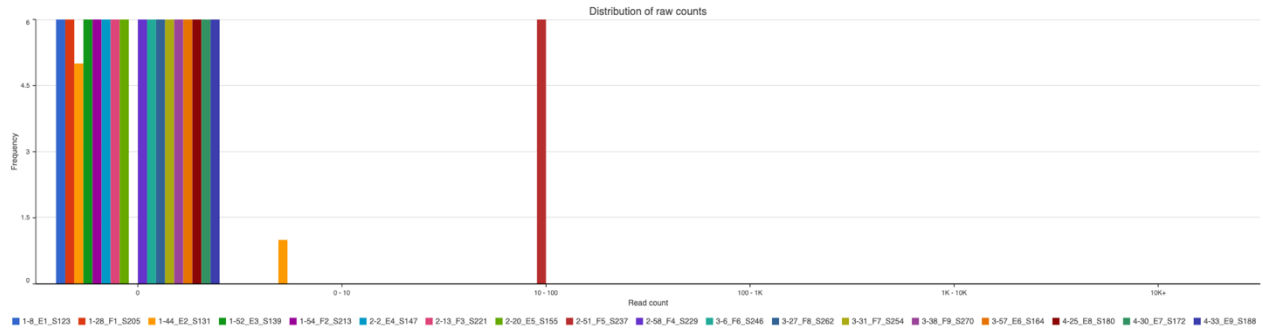

**Fig. 8. Distribution of raw read counts for all samples at 7 dpi.** The first number before each sample ID identifies the treatment type (1 = No infection, 2 = Infection only, 3 = Infection ZA inject, and 4 = Infection AB inject).



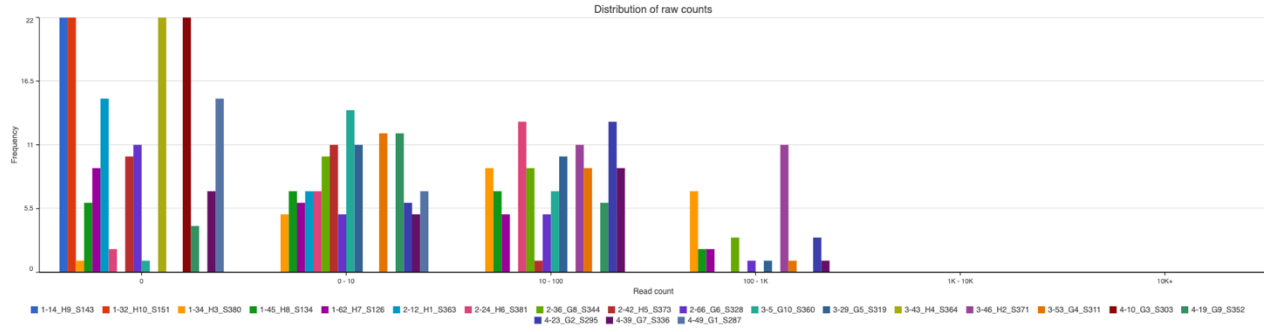

**Fig. 9. Distribution of raw read counts for all samples at 21 dpi.** The first number before each sample ID identifies the treatment type (1 = No infection, 2 = Infection only, 3 = Infection ZA inject, and 4 = Infection AB inject).

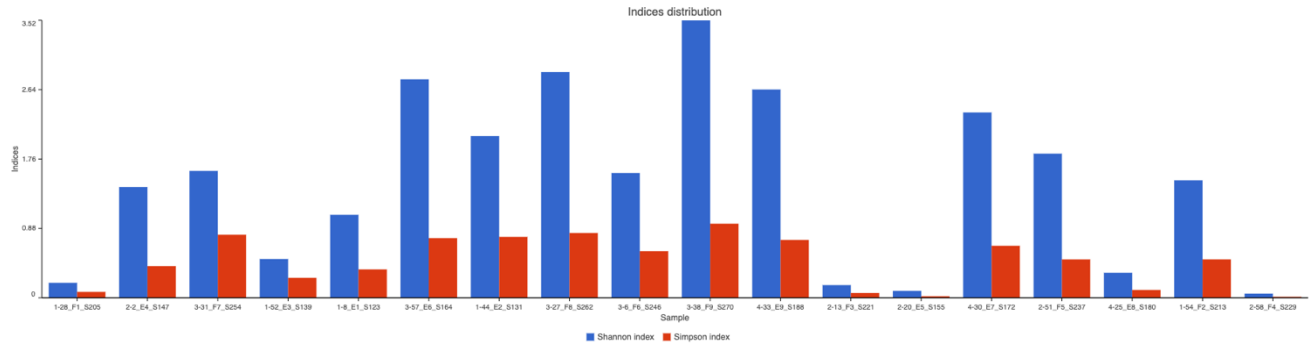

**Fig. 10. Shannon and Simpson indices of 7dpi. Alpha diversity reports depicted by Shannon and Simpson indices distributions for 18 samples of 7dpi (loss of sample numbers 17 and 50 due to poor quality) [23-25] where single samples and the variation of microbes in them are identified. The first number before each sample ID identifying the treatment type (1 = No infection, 2 = Infection only, 3 = Infection ZA inject, and 4 = Infection AB inject).**

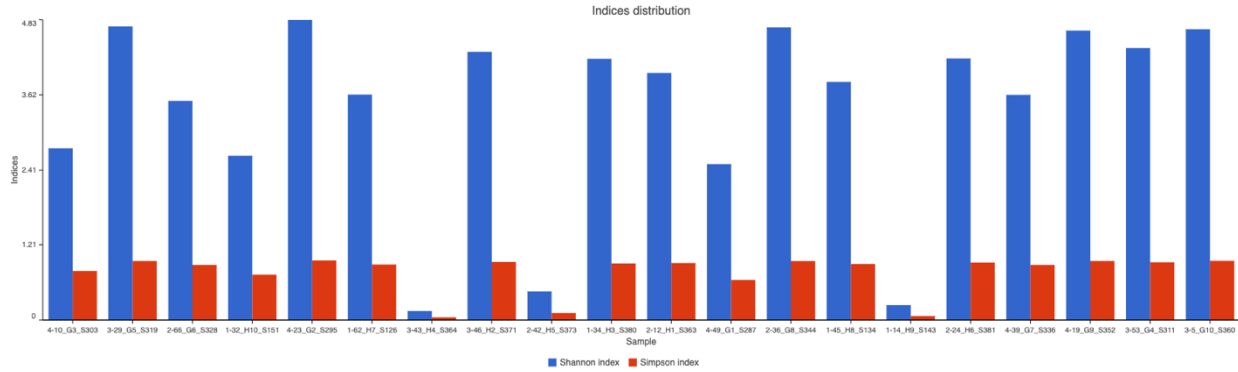

**Fig. 11. Shannon and Simpson indices of 21dpi.** Alpha diversity reports depicted by Shannon and Simpson distribution indices for 20 samples of 21dpi. The first number before each sample ID identifies the treatment type (1 = No infection, 2 = Infection only, 3 = Infection ZA inject, and 4 = Infection AB inject).

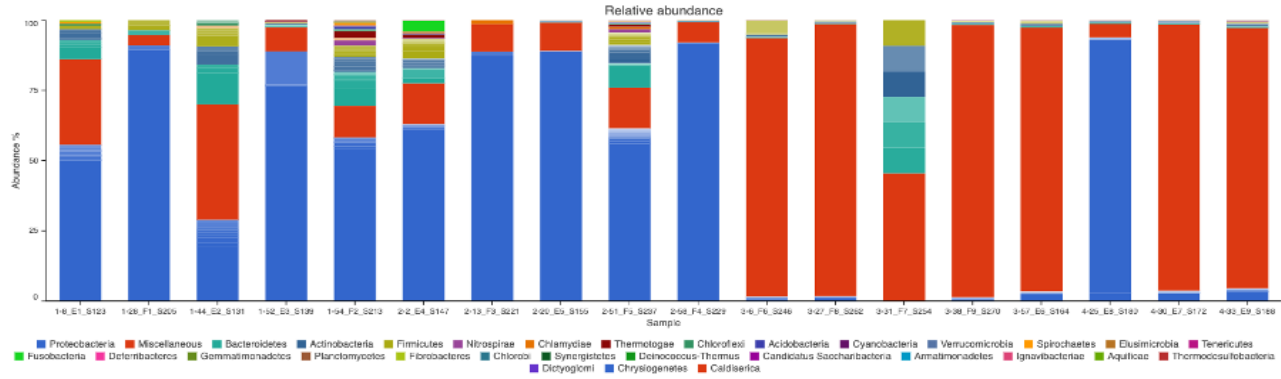

**Fig. 12. Relative Abundance of OTUs on 7 dpi for 18 samples.** The first number before each sample ID identifies the treatment type (1 = No infection, 2 = Infection only, 3 = Infection ZA inject, and 4 = Infection AB inject).

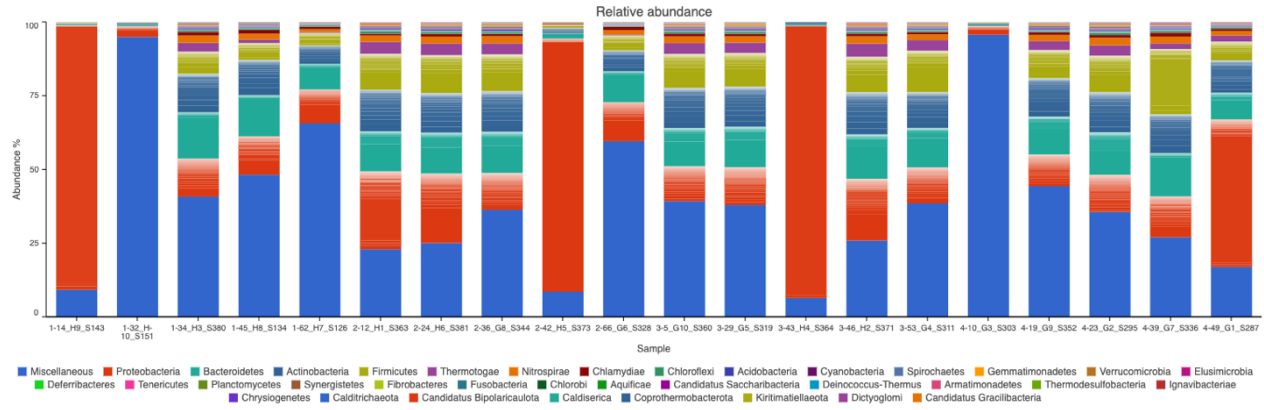

**Fig. 13. Relative Abundance of OTUs on 21 dpi for 20 samples.** The first number before each sample ID identifies the treatment type (1 = No infection, 2 = Infection only, 3 = Infection ZA inject, and 4 = Infection AB inject).
